# Supplementary material
Source: PubMed Central journal article supplement (PMC3502715)
Supplement: NIHMS417442-supplement-ESI.pdf [file NIHMS417442-supplement-ESI.pdf]

# Supporting Information

## Supporting Figures

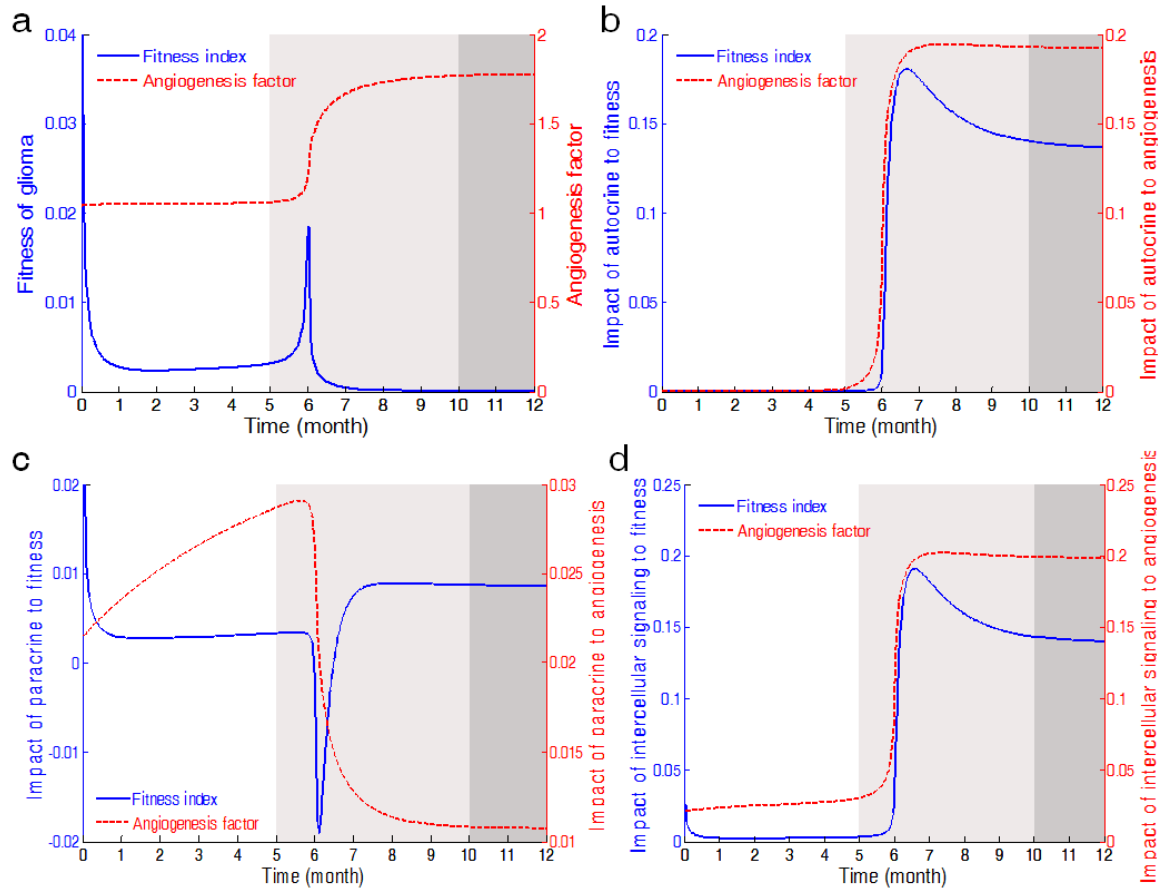

Supporting Fig. S1. a. One year evolution of fitness and angiogenesis factor of glioma. b. The contribution of autocrine to fitness ( $A_{glioma}^{fitness}$ ) and angiogenesis ( $A_{glioma}^{angio}$ ). c. The contribution of paracrine to fitness ( $P_{glioma}^{fitness}$ ) and angiogenesis ( $P_{glioma}^{angio}$ ). d. The collective contribution of intercellular signaling to fitness ( $T_{glioma}^{fitness}$ ) and angiogenesis ( $T_{glioma}^{angio}$ ).

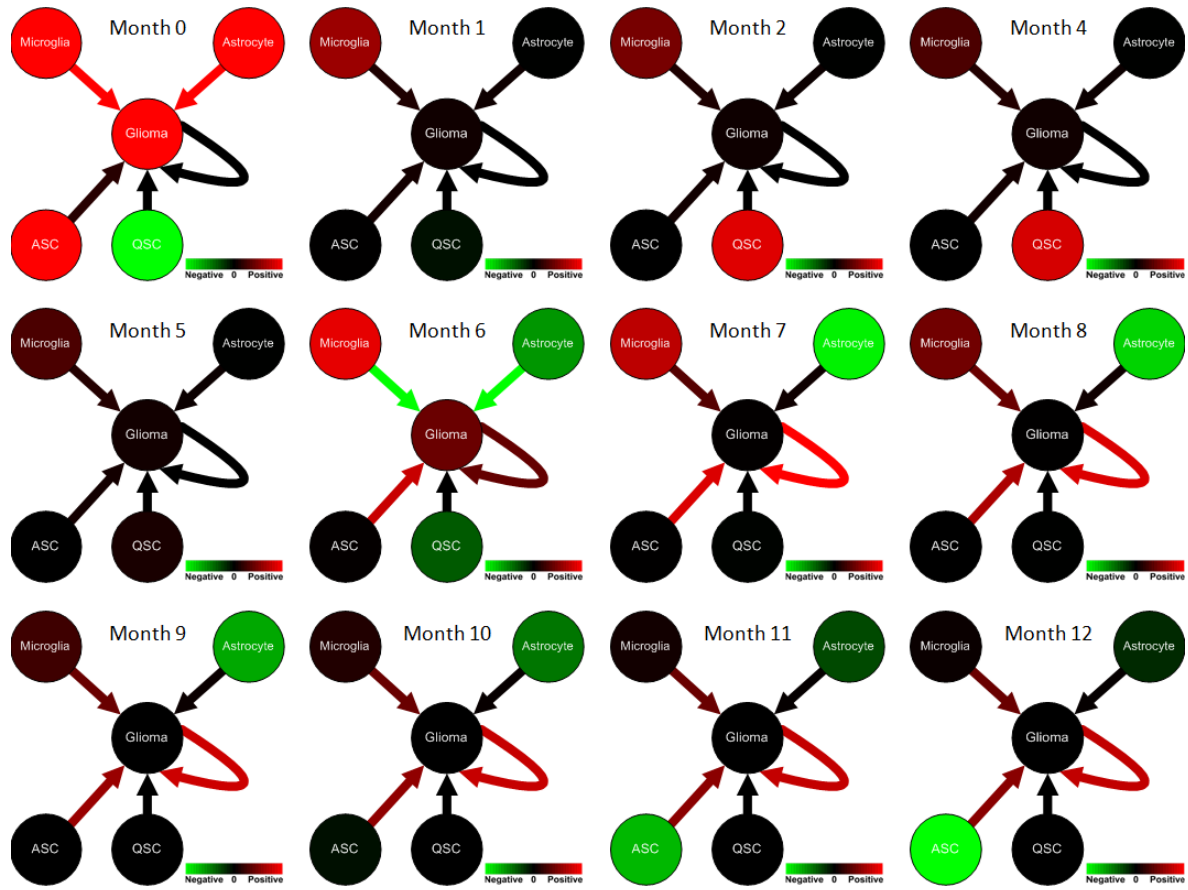

Supporting Fig. S2. Evolution of cell fitness and proliferation driving force. Red is positive, green is negative (see color bar). The color of cell node indicates the fitness of cell (Red means good, green means bad). The color of straight arrow indicates the paracrine strength, while the curved arrow indicates the autocrine strength.

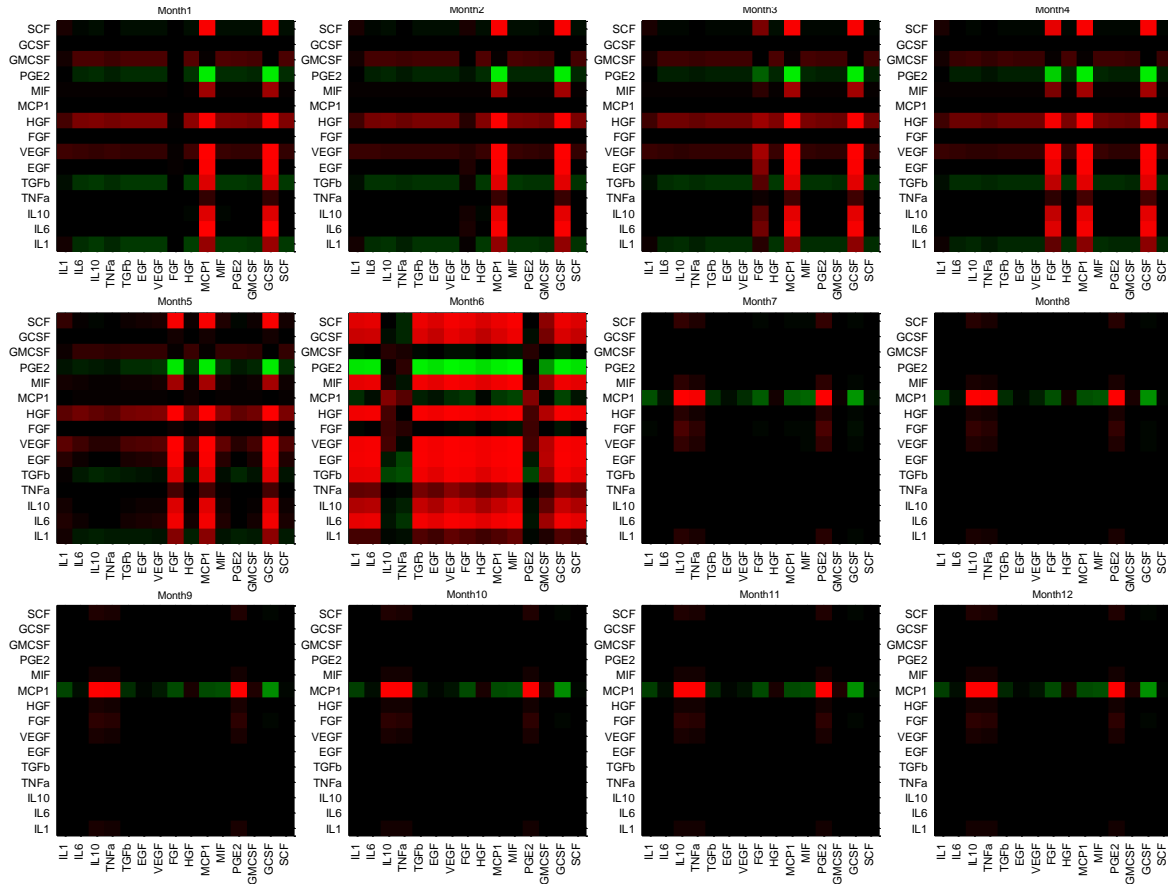

Supporting Fig. S3. Heat map of the correlation of cytokines in network level. The correlation factors are calculated at the end of each month. The cytokines highly correlated with others can be recognized as the important factors whose fluctuation can effectively rewire the network. The one year evolution shows a significant change of correlation during the sixth month. The ultimately high sensitivities also highlight the sixth month as the most active phase.

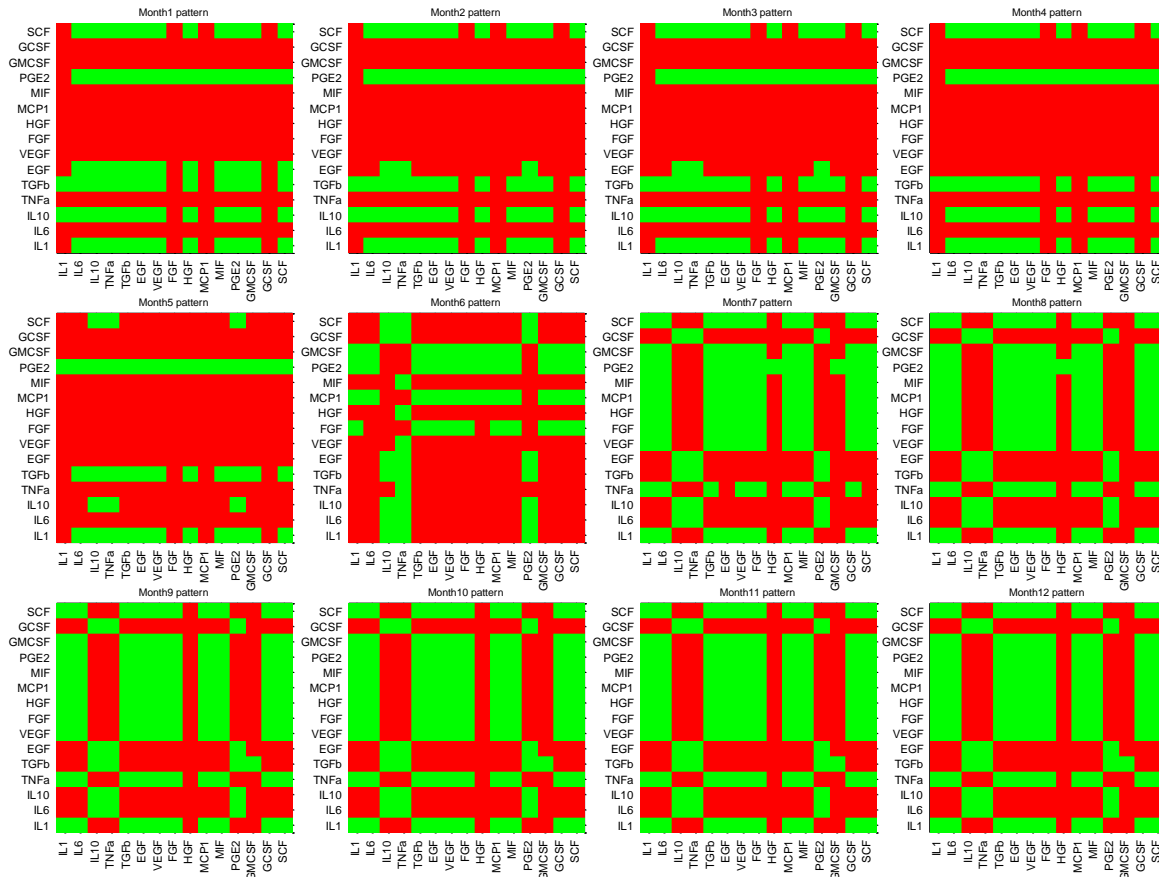

Supporting Fig. S4. Pattern map of the correlation of cytokines in network level. The positive correlations are in red, while the negative ones are in green. The correlations during first five months demonstrate similar pattern, whereas the last six months show a different pattern with more negative correlations than positive ones. The sixth month is recognized as the transition phase.

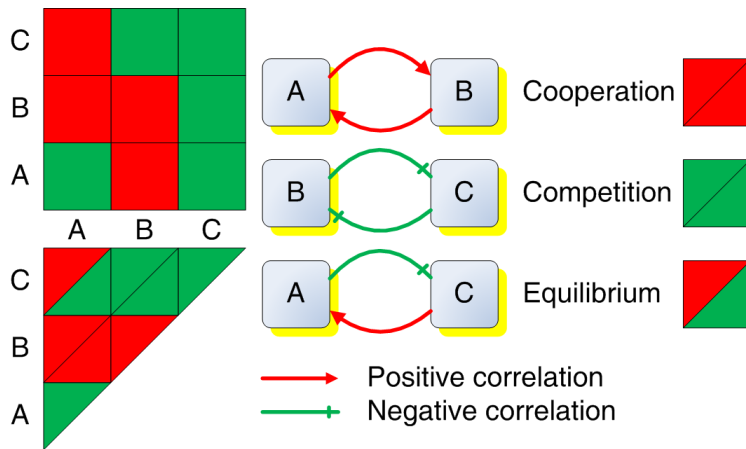

(a)

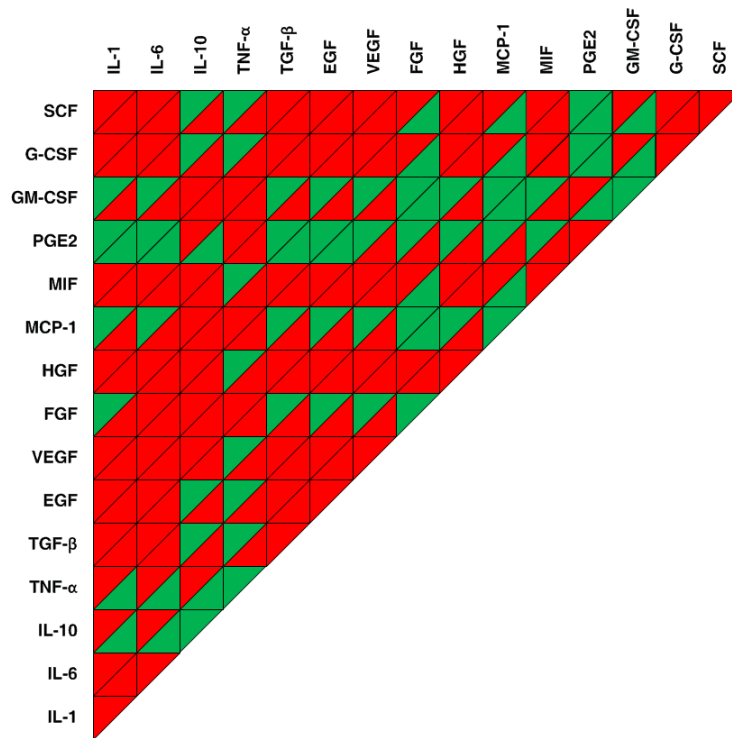

(b)

Supporting Fig. S5. Network level cytokine correlation pattern sketch map. a. The correlations of cytokines are generalized into cooperation, competition, and equilibrium, according to the positive or negative correlation. b. The correlation pattern at the sixth month has been illustrated.

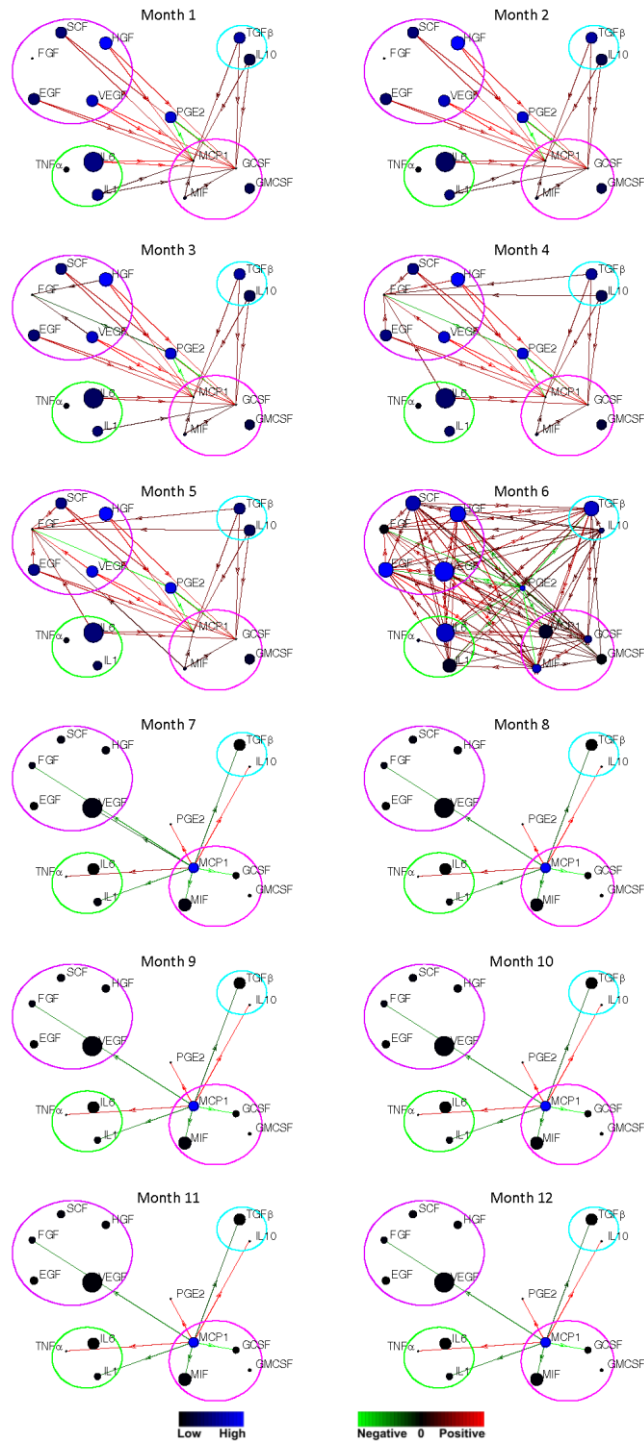

Supporting Fig. S6. One year evolution of grouped signaling protein correlation network. Fifteen signaling proteins are classified into five sub-sets, including growth factors (purple circle group), proinflammatory cytokines (yellow), anti-inflammatory cytokines (cyan), chemokines (magenta), and PGE2. Each blue circle (node) represents a cytokine. The diameter of the circle is proportional to the cytokine concentration, and the color indicates the impact factor of the cytokine according to the blue color bar. The arrow link between two nodes represents the directional regulation of two cytokines. The green-red color bar shows the strength of the up-regulation (red) and down-regulation (green).

# Supporting Methods

## 1. Deterministic description of the intercellular signaling network.

### Quiescent glioma stem cell (QSC)

FGF (FGF7 and FGF10) signaling contributes to the telogen to anagen transition, adding new insights into the process of stem cell activation(1).

$$\dot{x}_{QSC} = c_{QSC} + K_{QSC\_ASC} - K_{ASC\_QSC} - d_{QSC}x_{QSC} \quad (1)$$

where

$$K_{QSC\_ASC} = k_{QSC\_ASC}x_{ASC}$$

$$K_{ASC\_QSC} = k_{ASC\_QSC} \left( 1 + \frac{u_{QSC\_FGF} y_{FGF}}{s_{FGF} + y_{FGF}} \right) x_{QSC}$$

### Activated glioma stem cell (ASC)

EGF and FGF2 enhanced GBM brain tumor stem cells survival, proliferation, and subsequent sphere size (2).

Virtually all neural stem cells maintain an undifferentiated state and the capacity to self-renew in response to FGF2 (3).

IL6 signaling contributes to glioma malignancy through the promotion of GSC growth and survival (4).

Up-regulation of FGF5 during malignant progression might reflect dedifferentiation and acquisition of stem cell-like properties (5).

VEGF, FGF, SCF, IL1, HGF, and MIF are recognized as major factors that induce angiogenesis within GBM (6-21).

$$\begin{aligned} \dot{x}_{ASC} = & K_{ASC\_QSC} - K_{QSC\_ASC} + R_{glioma} P_{ASC\_glio} \left( \frac{y_{FGF}}{s_{FGF} + y_{FGF}} \right) \\ & + R_{ASC} \left( 1 - P_{glio\_ASC} \left( \frac{s_{FGF}}{s_{FGF} + y_{FGF}} \right) \left( \frac{u_{glio\_ASC\_IL6} y_{IL6}}{s_{IL6} + y_{IL6}} \right) \right) - d_{ASC} x_{ASC} \end{aligned} \quad (2)$$

where

$$R_{ASC} = r_{ASC} x_{ASC} \left( 1 - \frac{x_{QSC} + x_{ASC} + x_{glioma} + x_{astrocyte} + x_{microglia}}{x_{max} A_{angiogenesis}} \right) \left( 1 + \frac{u_{ASC\_EGF} y_{EGF}}{s_{EGF} + y_{EGF}} \right)$$

$$A_{angiogenesis} = \left(1 + \frac{u_{cell\_IL1} y_{IL1}}{s_{IL1} + y_{IL1}}\right) \left(1 + \frac{u_{cell\_VEGF} y_{VEGF}}{s_{VEGF} + y_{VEGF}}\right) \left(1 + \frac{u_{cell\_HGF} y_{HGF}}{s_{HGF} + y_{HGF}}\right) \left(1 + \frac{u_{cell\_MIF} y_{MIF}}{s_{MIF} + y_{MIF}}\right) \left(1 + \frac{u_{cell\_SCF} y_{SCF}}{s_{SCF} + y_{SCF}}\right) \left(1 + \frac{u_{cell\_FGF} y_{FGF}}{s_{FGF} + y_{FGF}}\right)$$

$R_{ASC}$  is the logistic proliferation term. Parameter  $x_{max}$  is the saturating concentration factor, whereas  $A_{angiogenesis}$  is the angiogenesis factor. So the product  $x_{max}A_{angiogenesis}$  represents the carrying capacity. The first term of the right-hand side of Eq. (2) is the activation term, and the second term is the deactivation term. The third term is the dedifferentiation from glioma cells to ASC, while the fourth term is the result of proliferation minus differentiation. The last term is the decay of ASC.

## Glioma

The experimental glioma genesis models indicate that when sufficient numbers of critical pathways are disrupted, glioma can originate from cells at all differentiation stages during glial cell development. In addition, progenitor cells appear to be more susceptible to transformation compared to the mature glial cells (22, 23).

The Fibroblast Growth Factor (FGF) signaling pathway is reported to stimulate glioblastoma (GBM) growth (24, 25). Autocrine FGF5 is predominantly a survival and migration factor for GBM cells (5).

EGF receptor signalling promotes proliferation, tissue invasion, increases chemoresistance and inhibits apoptosis of glioma cells (26-28).

IL-1, IL-6, IL-10, TGF $\beta$  and their receptors were strongly expressed in nearly all glioblastomas and cell lines tested, and have been postulated to promote glioma cell proliferation (29, 30, 31-33).

The overexpression of EGF receptors suggests the potential for autocrine/paracrine proliferation in response to EGF and Hb-EGF (34-40).

TNF- $\alpha$  increases EGF receptor expression in glioma cells in vitro (41).

A decrease in tumor-cell proliferation was observed in *vivo* by systemic treatment with a monoclonal antibody against VEGFR-2 (42).

TNF- $\alpha$  increases VEGF expression in glioma cells in vitro (43).

HGF and its receptor, Met, have been found in gliomas (44), where they are thought to be involved in cell motility, chemoattraction, and tumor invasion (45, 46).

G-CSF/G-CSFR is expressed constitutively in some glioma cell lines (47, 48) and in human gliomas, where it has been postulated to promote in an autocrine fashion glioma cell proliferation (49).



SCF and its receptor c-kit, are highly expressed in glioma cell lines (50, 51), and SCF can mediate the proliferation of glioma cells in vitro (52).

MIF plays a particularly critical part in cell cycle regulation and therefore in tumorigenesis as well. (10, 20, 53, 54). Recent studies have suggested a potentially broader role for MIF in growth regulation because of its ability to antagonize p53-mediated gene activation and apoptosis (55).

PGE2 has been shown to transiently prevent glioma cell proliferation in vitro (56).

$$\begin{aligned} \dot{x}_{glioma} = & R_{ASC} P_{glio\_ASC} \left( \frac{s_{FGF}}{s_{FGF} + y_{FGF}} \right) \left( \frac{u_{glio\_ASC\_IL6} y_{IL6}}{s_{IL6} + y_{IL6}} \right) + P_{glio\_astro} R_{astrocyte} \\ & + R_{glioma} \left( 1 - P_{ASC\_glio} \left( \frac{y_{FGF}}{s_{FGF} + y_{FGF}} \right) \right) - d_{glioma} \frac{s_{EGF}}{s_{EGF} + y_{EGF}} \frac{s_{FGF}}{s_{FGF} + y_{FGF}} \frac{s_{MIF}}{s_{MIF} + y_{MIF}} x_{glioma} \end{aligned} \quad (3)$$

where

$$\begin{aligned} R_{glioma} = & r_{glioma} x_{glioma} \left( 1 - \frac{x_{QSC} + x_{ASC} + x_{glioma} + x_{astrocyte} + x_{microglia}}{x_{max} A_{angiogenesis}} \right) \\ & \left( 1 + \frac{u_{glio\_IL1} y_{IL1}}{s_{IL1} + y_{IL1}} \right) \left( 1 + \frac{u_{glio\_IL6} y_{IL6}}{s_{IL6} + y_{IL6}} \right) \left( 1 + \frac{u_{glio\_IL10} y_{IL10}}{s_{IL10} + y_{IL10}} \right) \left( 1 + \frac{u_{glio\_TGF\beta} y_{TGF\beta}}{s_{TGF\beta} + y_{TGF\beta}} \right) \\ & \left( 1 + \frac{u_{glio\_EGF} \left( 1 + \frac{y_{TNF\alpha}}{s_{TNF\alpha} + y_{TNF\alpha}} \right) y_{EGF}}{s_{EGF} + y_{EGF}} \right) \left( 1 + \frac{u_{glio\_VEGF} \left( 1 + \frac{y_{TNF\alpha}}{s_{TNF\alpha} + y_{TNF\alpha}} \right) y_{VEGF}}{s_{VEGF} + y_{VEGF}} \right) \\ & \left( 1 + \frac{u_{glio\_HGF} y_{HGF}}{s_{HGF} + y_{HGF}} \right) \left( 1 + \frac{u_{glio\_GCSF} y_{GCSF}}{s_{GCSF} + y_{GCSF}} \right) \left( 1 + \frac{u_{glio\_SCF} y_{SCF}}{s_{SCF} + y_{SCF}} \right) \left( 1 + \frac{u_{glio\_MIF} y_{MIF}}{s_{MIF} + y_{MIF}} \right) \left( \frac{s_{PGE2}}{s_{PGE2} + y_{PGE2}} \right) \end{aligned}$$

$R_{glioma}$  is the logistic proliferation term. The product  $x_{max} A_{angiogenesis}$  indicates the carrying capacity. The first term of the right-hand side of Eq. (3) represents the differentiation from ASC to glioma cells. The second term describes the mutation from astrocytes to glioma cells. The third term is the result of proliferation minus dedifferentiation. The last term is the death of glioma cells due to life span.

## Activated Microglia

It is generally accepted that monocytes are the most likely source of all brain macrophages. These cells, which begin their migration into normal brain during embryogenesis, can differentiate into microglia (57).

Glioma cells express the microglia chemoattractant, MCP-1, at the mRNA and protein levels (58-60), and microglia possess the specific MCP-1 receptor, CCR2 (61). Thus, recruitment of microglia to the site of gliomas may in part result from the local production of MCP-1 (58, 62).

Microglia express receptors for EGF that enable them to proliferate in response to local release of this growth factor (63).

In vitro, VEGF can also induce the proliferation and migration of microglia (64).

HGF and its receptor, c-Met, have been found in microglia (65), where they are thought to be microglial chemoattractant and inducer of proliferation in vitro (66).

GM-CSF is potent mitogen for microglia (67).

TGF- $\beta$  inhibits the proliferation of microglia as well as their production of cytokines in vitro (68).

In vitro, SCF inhibits microglial proliferation and their expression of the inflammatory cytokines TNF $\alpha$  and IL-1b (69).

$$\begin{aligned} \dot{x}_{microglia} = & c_{microglia} \left( 1 + \frac{u_{micro\_MCP1} y_{MCP1}}{s_{MCP1} + y_{MCP1}} \right) + r_{microglia} x_{microglia} \left( 1 - \frac{x_{QSC} + x_{ASC} + x_{glioma} + x_{astrocyte} + x_{microglia}}{x_{max} A_{angiogenesis}} \right) \\ & \left( 1 + \frac{u_{micro\_EGF} y_{EGF}}{s_{EGF} + y_{EGF}} \right) \left( 1 + \frac{u_{micro\_VEGF} y_{VEGF}}{s_{VEGF} + y_{VEGF}} \right) \left( 1 + \frac{u_{micro\_HGF} y_{HGF}}{s_{HGF} + y_{HGF}} \right) \\ & \left( 1 + \frac{u_{micro\_GMCSF} y_{GMCSF}}{s_{GMCSF} + y_{GMCSF}} \right) \left( \frac{s_{TGF\beta}}{s_{TGF\beta} + y_{TGF\beta}} \right) \left( \frac{s_{SCF}}{s_{SCF} + y_{SCF}} \right) - d_{microglia} x_{microglia} \end{aligned} \quad (4)$$

The first term of the right-hand side of Eq. (4) is the replenishment of microglia from monocytes. The second term is logistic proliferation.

### Astrocyte

Astrocytes have been shown to originate from progenitors, and can migrate radially (70).

IL-1 has been shown to stimulate the growth of astrocytes in vitro (71-73). The duration of survival of GBM patients is enhanced when levels of intratumoral IL-1 $\beta$ , not necessarily produced by microglia, are elevated (74).

PGE2 released from activated microglia enhances astrocyte proliferation in vitro (75).

$$\dot{x}_{astrocyte} = c_{astrocyte} + R_{astrocyte} (1 - p_{glio\_astro}) - d_{astrocyte} x_{astrocyte} \quad (5)$$

where

$$R_{astrocyte} = r_{astrocyte} x_{astrocyte} \left( 1 - \frac{x_{QSC} + x_{ASC} + x_{glioma} + x_{astrocyte} + x_{microglia}}{x_{max} A_{angiogenesis}} \right) \left( 1 + \frac{u_{astro\_IL1} y_{IL1}}{s_{IL1} + y_{IL1}} \right) \left( 1 + \frac{u_{astro\_PGE2} y_{PGE2}}{s_{PGE2} + y_{PGE2}} \right)$$

The first term of the right-hand side of Eq. (5) represents supply of astrocytes from progenitors. The second term is the result of proliferation minus mutation.

### IL-1

Ameboid microglia, when activated, release significant quantities of IL-1 (76-78). Astrocyte is observed to release IL-1 in culture (76, 79). Malignant glioma cells also secrete or express IL-1 (80-82).

In vitro, SCF inhibits microglial proliferation and their expression of the inflammatory cytokine IL-1 $\beta$  (69).

$$\dot{y}_{IL1} = k_{IL1\_glio}x_{glioma} + k_{IL1\_micro}x_{microglia} \frac{s_{SCF}}{s_{SCF} + y_{SCF}} + k_{IL1\_astro}x_{astrocyte} - d_{IL1}y_{IL1} \quad (6)$$

## IL-6

Glioma secretes IL-6 (29, 83-86).

When cultured in the presence of IL-1 $\beta$ , the human glioma cell lines U251 and HP591 demonstrated a marked increase in IL-6 production (83).

IL-1 $\beta$  has been shown to exert a strong inducing signal for IL-6 in primary human/rat astrocytes (78, 87).

IL-6 also released by microglia (78, 88, 89)

$$\dot{y}_{IL6} = k_{IL6\_glio}x_{glioma} \left( 1 + \frac{u_{IL6\_IL1}y_{IL1}}{s_{IL1} + y_{IL1}} \right) + k_{IL6\_astro}x_{astrocyte} \left( \frac{y_{IL1}}{s_{IL1} + y_{IL1}} \right) + k_{IL6\_micro}x_{microglia} - d_{IL6}y_{IL6} \quad (7)$$

## IL-10

Microglia are the major source of IL-10 in gliomas (33, 90).

$$\dot{y}_{IL10} = k_{IL10\_micro}x_{microglia} - d_{IL10}y_{IL10} \quad (8)$$

## TNF- $\alpha$

TNF- $\alpha$  is one of the products of activated microglia (30, 78, 91-93).

In vitro, SCF down-regulates microglial expression of TNF- $\alpha$  (69).

Astrocyte produces TNF- $\alpha$  in response to IL-1 $\beta$  (78, 94-96).

$$\dot{y}_{TNF\alpha} = k_{TNF\alpha\_micro}x_{microglia} \frac{s_{SCF}}{s_{SCF} + y_{SCF}} + k_{TNF\alpha\_astro}x_{astrocyte} \left( \frac{y_{IL1}}{s_{IL1} + y_{IL1}} \right) - d_{TNF\alpha}y_{TNF\alpha} \quad (9)$$

## TGF- $\beta$

The glioma cancer stem cells produce TGF- $\beta$ 1 (97).

Human GBM cell lines have been shown to produce TGF- $\beta$ 2 (31). IL-1 $\beta$  also modulates the secretion of TGF- $\beta$  from glioma cells *in vitro*, although the modulation has been shown to be both stimulatory and inhibitory, depending upon the cell line used (98, 99).

Microglia has been shown to derive TGF-beta (100-102).

$$\dot{y}_{TGF\beta} = k_{TGF\beta\_ASC}x_{ASC} + k_{TGF\beta\_glio}x_{glioma} \left( 1 + \frac{u_{TGF\beta\_IL1}y_{IL1}}{s_{IL1} + y_{IL1}} \right) + k_{TGF\beta\_micro}x_{microglia} - d_{TGF\beta}y_{TGF\beta} \quad (10)$$

## EGF

EGF can be produced by activated microglia *in vitro* (103).

Heparin binding-EGF (Hb-EGF), a member of the EGF family, is produced by gliomas (104).

$$\dot{y}_{EGF} = k_{EGF\_glio}x_{glioma} + k_{EGF\_micro}x_{microglia} - d_{EGF}y_{EGF} \quad (11)$$

## VEGF

Glioblastoma stem cells consistently secreted markedly elevated levels of VEGF (14, 105).

Both microglia and gliomas secrete VEGF (12, 13).

TNF- $\alpha$  increases VEGF expression in glioma cells *in vitro* (43).

MIF has been observed to induce a significant dose-dependent increase of VEGF (54, 106).

$$\dot{y}_{VEGF} = k_{VEGF\_ASC}x_{ASC} + k_{VEGF\_glio}x_{glioma} \left( 1 + \frac{u_{VEGF\_TNF\alpha}y_{TNF\alpha}}{s_{TNF\alpha} + y_{TNF\alpha}} \right) \left( 1 + \frac{u_{VEGF\_MIF}y_{MIF}}{s_{MIF} + y_{MIF}} \right) + k_{VEGF\_micro}x_{microglia} - d_{VEGF}y_{VEGF} \quad (12)$$

## FGF

FGF5 is frequently expressed in embryonic tissues and has been recently described as a stem cell marker (107). Consequently, up-regulation during malignant progression might reflect dedifferentiation and acquisition of stem cell-like properties (5). FGF has also been recognized as an autocrine signaling pathway in human embryonic stem cells (108).

Secreted FGF5 protein has been reported to generally present in the GBM cells *in vivo* and *in vitro* (5).

$$\dot{y}_{FGF} = k_{FGF\_ASC}x_{ASC} + k_{FGF\_glio}x_{glioma} - d_{FGF}y_{FGF} \quad (13)$$

## HGF

HGF and its receptor, c-Met, have been found in microglia (65) and gliomas (44, 109).

The expression of HGF in microglia is up-regulated by PGE2 in vitro and in vivo after ischemic injury (65).

$$\dot{y}_{HGF} = k_{HGF\_glio}x_{glioma} + k_{HGF\_micro}x_{microglia} \left( 1 + \frac{u_{HGF\_PGE2}y_{PGE2}}{s_{PGE2} + y_{PGE2}} \right) - d_{HGF}y_{HGF} \quad (14)$$

### MCP-1

Glioma cells express the microglia chemoattractant, MCP-1, at the mRNA and protein levels (58-60).

$$\dot{y}_{MCP1} = k_{MCP1\_glio}x_{glioma} - d_{MCP1}y_{MCP1} \quad (15)$$

### MIF

MIF has been shown to be produced by glioma cell (110), and its expression was up-regulated under hypoxic and hypoglycemic stress conditions in vitro (10).

MIF was also secreted by activated microglia (20), and its secretion from macrophage can be induced by TNF- $\alpha$  (111).

$$\dot{y}_{MIF} = k_{MIF\_micro}x_{microglia} \left( 1 + \frac{u_{MIF\_TNF\alpha}y_{TNF\alpha}}{s_{TNF\alpha} + y_{TNF\alpha}} \right) + k_{MIF\_glio} \left( 1 + \frac{u_{MIF\_glio}x_{glioma}}{s_{glioma} + x_{glioma}} \right) x_{glioma} - d_{MIF}y_{MIF} \quad (16)$$

### PGE2

Glioma-infiltrating microglia are a major source of PGE2 production through the COX-2 pathway (112).

$$\dot{y}_{PGE2} = k_{PGE2\_micro}x_{microglia} - d_{PGE2}y_{PGE2} \quad (17)$$

### GM-CSF

Glioma cell lines express GM-CSF (47, 113). TGF- $\beta$ 2 and PGE2 has been shown to suppress GM-CSF production by gliomas in vitro (114). IL-10 inhibits GM-CSF(115-117).

$$\dot{y}_{GMCSF} = k_{GMCSF\_glio}x_{glioma} \frac{s_{PGE2}}{s_{PGE2} + y_{PGE2}} \frac{s_{TGF\beta}}{s_{TGF\beta} + y_{TGF\beta}} + k_{GMCSF\_micro}x_{microglia} - d_{GMCSF} \left( 1 + \frac{u_{GMCSF\_IL10}y_{IL10}}{s_{IL10} + y_{IL10}} \right) y_{GMCSF} \quad (18)$$

### G-CSF

G-CSF is expressed constitutively in some glioma cell lines and in human gliomas (47, 49). IL-10 inhibits G-CSF(115, 116).

$$\dot{y}_{GCSF} = k_{GCSF\_glio}x_{glioma} - d_{GCSF} \left( 1 + \frac{u_{GCSF\_IL10}y_{IL10}}{s_{IL10} + y_{IL10}} \right) y_{GCSF} \quad (19)$$

## SCF

SCF and its receptor c-kit, are highly expressed in glioma cell lines (50, 51) and microglia (118, 119).

$$\dot{y}_{SCF} = k_{SCF\_glio}x_{glioma} + k_{SCF\_micro}x_{microglia} - d_{SCF}y_{SCF} \quad (20)$$

## 2. Stochastic description of rate parameters

### 2.1 Bounded noise

We use bounded noise to describe the stochastic proliferation / mutation / differentiation /dedifferentiation rate ( $r_{ASC}$ ,  $r_{glioma}$ ,  $r_{astrocyte}$ ,  $r_{microglia}$ ,  $P_{glio\_astro}$ ,  $P_{glio\_ASC}$ ,  $P_{ASC\_glio}$ ).

$$r_{stochastic}(t) = r_{deterministic}(1 + \varepsilon \sin(\Omega t + \sigma W(t) + \Delta)) \quad (21)$$

where  $W(t)$  is a standard Wiener process.  $\zeta(t) = \varepsilon \sin(\Omega t + \sigma W(t) + \Delta)$  is the so called bounded noise with the mathematical expectation at a fixed time  $t$

$$E[\zeta(t)] = e^{-t\sigma^2/2} \sin(\Omega t + \Delta) = \begin{cases} 0 & \sigma \rightarrow \infty \\ \sin(\Omega t + \Delta) & \sigma \rightarrow 0 \end{cases} \quad (22)$$

and the auto correlation function

$$R(\tau) = \frac{1}{2} \exp\left(-\frac{\sigma^2}{2}|\tau|\right) \cos \Omega \tau = \begin{cases} \frac{1}{2} \delta_{\tau,0} & \sigma \rightarrow \infty \\ \frac{1}{2} \cos \Omega \tau & \sigma \rightarrow 0 \end{cases} \quad (23)$$

where  $\delta_{\tau,0}$  is Kronecker delta. Thus, the bounded noise  $\zeta(t)$  tends to a finite power white noise as  $\sigma \rightarrow \infty$ , and becomes a harmonic noise as  $\sigma \rightarrow 0$ .

The stochastic rate term  $r_{stochastic}(t)$  describes a stochastic fluctuation around the average rate  $r_{deterministic}$ , which should be estimated according to the experimental data. There are three critical parameters: the strength factor  $0 \leq \varepsilon < 1$ , the bandwidth factor  $\sigma \geq 0$ , and the center frequency  $\Omega > 0$ .

The flexible and adjustable characteristics of bounded noise make it an appropriate description of the intrinsically random rates and a good approximation to cell cycles according to heterogeneous scenarios.

Cell cycle is obviously periodic; however, the endogenous and exogenous signals that influence the cellular activity may be aperiodic. Thus, it is reasonable to assume that the rate is a stochastic perturbation

to periodic fluctuations. In case the cellular activity observed in experiment shows regular periodic fluctuations around a mean value, a small  $\sigma$  should be adopted. Then, the center frequency  $\Omega$  is determined by the period of cell cycle  $T_{\text{cell cycle}}$

$$\Omega = \frac{2\pi}{T_{\text{cell cycle}}} = \frac{2\pi \times (\text{basal proliferation rate})}{\ln 2} \quad (24)$$

Alternatively, when there do not exist regular fluctuations or a characteristic frequency band, a large  $\sigma$  will be chosen to capture the stochastic nature.

## 2.2 Poisson white noise

We introduce Poisson white noise  $\zeta(t)$  to describe the stochastic immigration, emigration and supply from normal neural stem cell / monocytes / progenitors ( $c_{\text{QSC}}$ ,  $c_{\text{microglia}}$ ,  $c_{\text{astrocyte}}$ ).

$$\zeta(t) = \sum_{k=1}^{N(t)} Y_k \delta(t - \tau_k) \quad (25)$$

$\zeta(t)$  is the stochastic representation of discrete event type fluctuation.  $Y_k$  is the magnitude of  $k$ th discrete event, i.e., the number of cell increasing (decreasing) at time point  $t = \tau_k$ ,  $N_i(t)$  denotes a non-homogeneous Poisson counting process with arrival rate function  $\lambda_i(t) > 0$  (i.e., the number of events per unit time) and gives the number of events that arrive in the time interval  $[0, t]$ .

$$\lambda_{\text{QSC}}(t) = c_{\text{QSC}} \quad (26)$$

$$\lambda_{\text{astrocyte}}(t) = c_{\text{astrocyte}} \quad (27)$$

$$\lambda_{\text{microglia}}(t) = c_{\text{microglia}} \left( 1 + \frac{u_{\text{micro\_MCP1}} y_{\text{MCP1}}}{s_{\text{MCP1}} + y_{\text{MCP1}}} \right) \quad (28)$$

## 2.3 Gaussian white noise

We use Gaussian white noise to describe the stochastic fluctuation of cytokine secretion rates and up-regulation ratio via receptor kinase signaling ( $k_i$  and  $u_i$ ).

$$k_{\text{stochastic}}(t) = k_{\text{deterministic}} \max(0, 1 + \sigma_g \eta(t)) \quad (29)$$

$$u_{\text{stochastic}}(t) = u_{\text{deterministic}} \max(0, 1 + \sigma_g \eta(t)) \quad (30)$$

where  $\eta(t)$  is a Gaussian white noise with mean zero and standard deviation 1.

# Supporting Tables

**Supporting Table S1. Deterministic Parameters**

| Variable        | Description                                                                                                                                                                        | Value  | Dimension                        | Reference      | Comment                                                         |
|-----------------|------------------------------------------------------------------------------------------------------------------------------------------------------------------------------------|--------|----------------------------------|----------------|-----------------------------------------------------------------|
| $x_{QSC}$       | Concentration of quiescent glioma stem like cell                                                                                                                                   | 1E4    | ml <sup>-1</sup>                 | (120, 121)     | Initial density                                                 |
| $x_{ASC}$       | Concentration of activated glioma stem like cell                                                                                                                                   | 0      | ml <sup>-1</sup>                 |                | Initial density is zero                                         |
| $x_{glioma}$    | Concentration of glioma cell                                                                                                                                                       | 0      | ml <sup>-1</sup>                 |                | Initial density                                                 |
| $x_{microglia}$ | Concentration of microglia                                                                                                                                                         | 2E6    | ml <sup>-1</sup>                 | (122-125)      | Initial density                                                 |
| $x_{astrocyte}$ | Concentration of astrocyte                                                                                                                                                         | 2.8E7  | ml <sup>-1</sup>                 | (123, 126-130) | Initial density                                                 |
| $y_{IL1}$       | Concentration of IL1                                                                                                                                                               | 150    | pM                               | Estimated      | Initial Concentration                                           |
| $y_{IL6}$       | Concentration of IL6                                                                                                                                                               | 250    | pM                               | Estimated      | Initial                                                         |
| $y_{IL10}$      | Concentration of IL10                                                                                                                                                              | 150    | pM                               | Estimated      | Initial                                                         |
| $y_{TNF\alpha}$ | Concentration of TNF $\alpha$                                                                                                                                                      | 80     | pM                               | Estimated      | Initial                                                         |
| $y_{TGF\beta}$  | Concentration of TGF $\beta$                                                                                                                                                       | 150    | pM                               | Estimated      | Initial                                                         |
| $y_{EGF}$       | Concentration of EGF                                                                                                                                                               | 150    | pM                               | Estimated      | Initial                                                         |
| $y_{VEGF}$      | Concentration of VEGF                                                                                                                                                              | 150    | pM                               | Estimated      | Initial                                                         |
| $y_{FGF}$       | Concentration of FGF                                                                                                                                                               | 0      | pM                               | Estimated      | Initial                                                         |
| $y_{HGF}$       | Concentration of HGF                                                                                                                                                               | 150    | pM                               | Estimated      | Initial                                                         |
| $y_{MCP1}$      | Concentration of MCP1                                                                                                                                                              | 0      | pM                               | Estimated      | Initial                                                         |
| $y_{COX2}$      | Concentration of COX2                                                                                                                                                              | 40     | pM                               | Estimated      | Initial                                                         |
| $y_{PGE2}$      | Concentration of PGE2                                                                                                                                                              | 150    | pM                               | Estimated      | Initial                                                         |
| $y_{GMCSF}$     | Concentration of GMCSF                                                                                                                                                             | 150    | pM                               | Estimated      | Initial                                                         |
| $y_{GCSF}$      | Concentration of GCSF                                                                                                                                                              | 0      | pM                               | Estimated      | Initial                                                         |
| $y_{SCF}$       | Concentration of SCF                                                                                                                                                               | 150    | pM                               | Estimated      | Initial                                                         |
| $c_{QSC}$       | Rate of supply of quiescent glioma stem cell from normal neural stem cell                                                                                                          | 1      | ml <sup>-1</sup> h <sup>-1</sup> | Estimated      |                                                                 |
| $c_{microglia}$ | Rate of replenishment of microglia from monocytes                                                                                                                                  | 800    | ml <sup>-1</sup> h <sup>-1</sup> | (57)           |                                                                 |
| $c_{astrocyte}$ | Rate of supply of astrocyte from progenitors                                                                                                                                       | 2000   | ml <sup>-1</sup> h <sup>-1</sup> | Estimated      |                                                                 |
| $r_{ASC}$       | Average basal proliferation (including self-renewal and differentiation) rate of activated glioma stem cell obtained in the absence of population limitation and cytokine stimulus | 5E-4   | h <sup>-1</sup>                  | (131)          | $\frac{\ln 2}{\text{cell cycle period}}$<br>Cell cycle ~58 days |
| $r_{glioma}$    | Average basal proliferation rate of glioma cell obtained in the absence of population limitation and cytokine stimulus                                                             | 0.0174 | h <sup>-1</sup>                  | (132)          | Cell cycle ~40 hours                                            |



|                             |                                                                                                                      |        |                  |                     |                                             |
|-----------------------------|----------------------------------------------------------------------------------------------------------------------|--------|------------------|---------------------|---------------------------------------------|
| $r_{\text{microglia}}$      | Average basal proliferation rate of microglia obtained in the absence of population limitation and cytokine stimulus | 0.0174 | $\text{h}^{-1}$  | (133-135)           | Cell cycle ~40 hours                        |
| $r_{\text{astrocyte}}$      | Average basal proliferation rate of astrocyte obtained in the absence of population limitation and cytokine stimulus | 0.0174 | $\text{h}^{-1}$  | (130)               | Cell cycle ~40 hours                        |
| $x_{\text{max}}$            | Maximum cell population (including QSC, ASC, glioma, microglia, astrocyte) level due to limited nutrition and space  | 3E7    | $\text{ml}^{-1}$ | (122, 124, 135-137) | Density-dependent inhibition of cell growth |
| $u_{\text{cell\_IL1}}$      | Maximum up-regulation ratio of maximum cell concentration due to angiogenic effect of IL1                            | 0.1    |                  | (7, 8, 11)          |                                             |
| $u_{\text{cell\_VEGF}}$     | Maximum up-regulation ratio of maximum cell concentration due to angiogenic effect of VEGF                           | 0.2    |                  | (6, 12-14)          |                                             |
| $u_{\text{cell\_FGF}}$      | Maximum up-regulation ratio of maximum cell concentration due to angiogenic effect of FGF                            | 0.2    |                  | (6, 15-18)          |                                             |
| $u_{\text{cell\_HGF}}$      | Maximum up-regulation ratio of maximum cell concentration due to angiogenic effect of HGF                            | 0.1    |                  | (6, 9, 138)         |                                             |
| $u_{\text{cell\_MIF}}$      | Maximum up-regulation ratio of maximum cell concentration due to angiogenic effect of MIF                            | 0.1    |                  | (10, 19, 20)        |                                             |
| $u_{\text{cell\_SCF}}$      | Maximum up-regulation ratio of maximum cell concentration due to angiogenic effect of SCF                            | 0.15   |                  | (21)                |                                             |
| $u_{\text{QSC\_FGF}}$       | Maximum up-regulation ratio of QSC activation rate by FGF                                                            | 2      |                  | (1)                 |                                             |
| $u_{\text{ASC\_EGF}}$       | Maximum up-regulation ratio of ASC proliferation rate by EGF                                                         | 2      |                  | (2)                 |                                             |
| $u_{\text{glio\_ASC\_IL6}}$ | Maximum up-regulation ratio of differentiation rate from ASC to glioma by IL6                                        | 2      |                  | (4)                 |                                             |
| $u_{\text{glio\_IL1}}$      | Maximum up-regulation ratio of glioma proliferation rate by IL1                                                      | 2      |                  | (113, 139, 140)     |                                             |
| $u_{\text{glio\_IL6}}$      | Maximum up-regulation ratio of glioma proliferation rate by IL6                                                      | 2      |                  | (29)                |                                             |
| $u_{\text{glio\_IL10}}$     | Maximum up-regulation ratio of glioma proliferation rate by IL10                                                     | 2      |                  | (33)                |                                             |
| $u_{\text{glio\_TGF}\beta}$ | Maximum up-regulation ratio of glioma proliferation rate by TGF $\beta$                                              | 2      |                  | (113, 141-143)      |                                             |
| $u_{\text{glio\_EGF}}$      | Maximum up-regulation ratio of glioma proliferation rate by EGF                                                      | 3      |                  | (24, 36, 39, 40)    |                                             |
| $u_{\text{glio\_VEGF}}$     | Maximum up-regulation ratio of glioma proliferation rate by VEGF                                                     | 3      |                  | (42)                |                                             |
| $u_{\text{glio\_HGF}}$      | Maximum up-regulation ratio of                                                                                       | 3      |                  | (46)                |                                             |

|                              |                                                                                                  |        |  |                  |  |
|------------------------------|--------------------------------------------------------------------------------------------------|--------|--|------------------|--|
|                              | glioma proliferation rate by HGF                                                                 |        |  |                  |  |
| $u_{\text{glio\_GCSF}}$      | Maximum up-regulation ratio of glioma proliferation rate by GCSF                                 | 2      |  | (49)             |  |
| $u_{\text{glio\_SCF}}$       | Maximum up-regulation ratio of glioma proliferation rate by SCF                                  | 2      |  | (50, 52)         |  |
| $u_{\text{glio\_MIF}}$       | Maximum up-regulation ratio of glioma proliferation rate by MIF                                  | 2      |  | (10, 20, 53, 54) |  |
| $u_{\text{MIF\_glio}}$       | Maximum up-regulation ratio of secretion rate of MIF from glioma due to hypoxia and hypoglycemia | 6      |  | (10)             |  |
| $u_{\text{micro\_MCP1}}$     | Maximum up-regulation ratio of replenishment rate of microglia due to chemotaxis                 | 5      |  | (58, 62)         |  |
| $u_{\text{micro\_EGF}}$      | Maximum up-regulation ratio of microglia proliferation rate by EGF                               | 2      |  | (63)             |  |
| $u_{\text{micro\_VEGF}}$     | Maximum up-regulation ratio of microglia proliferation rate by VEGF                              | 2      |  | (64)             |  |
| $u_{\text{micro\_HGF}}$      | Maximum up-regulation ratio of microglia proliferation rate by HGF                               | 2      |  | (65, 66)         |  |
| $u_{\text{micro\_GMCSF}}$    | Maximum up-regulation ratio of microglia proliferation rate by GMCSF                             | 2      |  | (67, 135)        |  |
| $u_{\text{astro\_IL1}}$      | Maximum up-regulation ratio of astrocyte proliferation rate by IL-1                              | 2.5694 |  | (71, 72)         |  |
| $u_{\text{astro\_PGE2}}$     | Maximum up-regulation ratio of astrocyte proliferation rate by PGE2                              | 2      |  | (75)             |  |
| $u_{\text{IL6\_IL1}}$        | Maximum up-regulation ratio of IL-6 production by glioma in the presence of IL-1 $\beta$         | 2      |  | (83)             |  |
| $u_{\text{TGF}\beta\_IL1}$   | Maximum up-regulation ratio of TGF- $\beta$ production by glioma in the presence of IL-1 $\beta$ | 2      |  | (98, 99)         |  |
| $u_{\text{GMCSF\_IL10}}$     | Maximum up-regulation ratio of decay rate of GM-CSF in the presence of IL-10                     | 1      |  | (115-117)        |  |
| $u_{\text{GCSF\_IL10}}$      | Maximum up-regulation ratio of decay rate of G-CSF in the presence of IL-10                      | 1      |  | (115, 116)       |  |
| $u_{\text{VEGF\_TNF}\alpha}$ | Maximum up-regulation ratio of VEGF production by glioma in the presence of TNF $\alpha$         | 2      |  | (43)             |  |
| $u_{\text{MIF\_TNF}\alpha}$  | Maximum up-regulation ratio of MIF production by microglia in the presence of TNF $\alpha$       | 2      |  | (20, 111)        |  |
| $u_{\text{VEGF\_MIF}}$       | Maximum up-regulation ratio of VEGF production by glioma in the presence of MIF                  | 2      |  | (54, 106)        |  |
| $u_{\text{HGF\_PGE2}}$       | Maximum up-regulation ratio of                                                                   | 2      |  | (65)             |  |

|                        |                                                                                                    |       |                  |           |  |
|------------------------|----------------------------------------------------------------------------------------------------|-------|------------------|-----------|--|
|                        | HGF production by microglia in the presence of PGE2                                                |       |                  |           |  |
| $s_{\text{glioma}}$    | Half max concentration of glioma cell in hypoxia dependent MIF production                          | 1.5e7 | $\text{ml}^{-1}$ | (10)      |  |
| $s_{\text{IL1}}$       | Saturation concentration of IL-1 producing half max regulation effect to cellular activity         | 2200  | pM               | Estimated |  |
| $s_{\text{IL6}}$       | Saturation concentration of IL-6 producing half max regulation effect to cellular activity         | 2200  | pM               | Estimated |  |
| $s_{\text{IL10}}$      | Saturation concentration of IL-10 producing half max regulation effect to cellular activity        | 2200  | pM               | Estimated |  |
| $s_{\text{TGF}\beta}$  | Saturation concentration of TGF $\beta$ producing half max regulation effect to cellular activity  | 2200  | pM               | Estimated |  |
| $s_{\text{TNF}\alpha}$ | Saturation concentration of TNF $\alpha$ producing half max regulation effect to cellular activity | 2200  | pM               | Estimated |  |
| $s_{\text{EGF}}$       | Saturation concentration of EGF producing half max regulation effect to cellular activity          | 2200  | pM               | Estimated |  |
| $s_{\text{VEGF}}$      | Saturation concentration of VEGF producing half max regulation effect to cellular activity         | 2200  | pM               | Estimated |  |
| $s_{\text{FGF}}$       | Saturation concentration of FGF producing half max regulation effect to cellular activity          | 2200  | pM               | Estimated |  |
| $s_{\text{HGF}}$       | Saturation concentration of HGF producing half max regulation effect to cellular activity          | 2200  | pM               | Estimated |  |
| $s_{\text{GCSF}}$      | Saturation concentration of G-CSF producing half max regulation effect to cellular activity        | 2200  | pM               | Estimated |  |
| $s_{\text{SCF}}$       | Saturation concentration of SCF producing half max regulation effect to cellular activity          | 2200  | pM               | Estimated |  |
| $s_{\text{PGE2}}$      | Saturation concentration of PGE2 producing half max regulation effect to cellular activity         | 2200  | pM               | Estimated |  |
| $s_{\text{MCP1}}$      | Saturation concentration of MCP1 producing half max regulation effect to cellular activity         | 1100  | pM               | Estimated |  |
| $s_{\text{GMCSF}}$     | Saturation concentration of GM-CSF producing half max regulation effect to cellular activity       | 2200  | pM               | Estimated |  |
| $s_{\text{MIF}}$       | Saturation concentration of MIF producing half max regulation effect to cellular activity          | 2200  | pM               | Estimated |  |

|                 |                                                            |         |          |                            |                                                                       |
|-----------------|------------------------------------------------------------|---------|----------|----------------------------|-----------------------------------------------------------------------|
| $d_{QSC}$       | Death rate of quiescent glioma stem cell based on lifespan | 0.00001 | $h^{-1}$ | (144-146)                  | $\frac{\ln 2}{\text{cell half-life}}$<br>Stem cell half-life ~8 years |
| $d_{ASC}$       | Death rate of activated glioma stem cell based on lifespan | 0.0001  | $h^{-1}$ | (144-146)                  | Half-life ~9.6 months                                                 |
| $d_{glioma}$    | Death rate of glioma cell based on lifespan                | 0.001   | $h^{-1}$ | (147)                      | Half-life ~29 days                                                    |
| $d_{microglia}$ | Death rate of microglia based on lifespan                  | 0.001   | $h^{-1}$ | (147)                      | Half-life ~29 days                                                    |
| $d_{astrocyte}$ | Death rate of astrocyte based on lifespan                  | 0.001   | $h^{-1}$ | (147)                      | Half-life ~29 days                                                    |
| $d_{IL1}$       | Decay rate of IL-1 based on half-life                      | 0.6931  | $h^{-1}$ | (148-153)                  | Half-life ~1 hour                                                     |
| $d_{IL6}$       | Decay rate of IL-6 based on half-life                      | 0.6931  | $h^{-1}$ | (148-153)                  | Half-life ~1 hour                                                     |
| $d_{IL10}$      | Decay rate of IL-10 based on half-life                     | 0.6931  | $h^{-1}$ | (148-153)                  | Half-life ~1 hour                                                     |
| $d_{TNF\alpha}$ | Decay rate of TNF $\alpha$ based on half-life              | 0.6931  | $h^{-1}$ | (148-153)                  | Half-life ~1 hour                                                     |
| $d_{TGF\beta}$  | Decay rate of TGF $\beta$ based on half-life               | 0.6931  | $h^{-1}$ | (148-153)                  | Half-life ~1 hour                                                     |
| $d_{EGF}$       | Decay rate of EGF based on half-life                       | 0.6931  | $h^{-1}$ | (148-153)                  | Half-life ~1 hour                                                     |
| $d_{VEGF}$      | Decay rate of VEGF based on half-life                      | 0.6931  | $h^{-1}$ | (148-153)                  | Half-life ~1 hour                                                     |
| $d_{FGF}$       | Decay rate of FGF based on half-life                       | 0.6931  | $h^{-1}$ | (148-153)                  | Half-life ~1 hour                                                     |
| $d_{HGF}$       | Decay rate of HGF based on half-life                       | 0.6931  | $h^{-1}$ | (148-153)                  | Half-life ~1 hour                                                     |
| $d_{MCP1}$      | Decay rate of MCP1 based on half-life                      | 0.6931  | $h^{-1}$ | (148-153)                  | Half-life ~1 hour                                                     |
| $d_{MIF}$       | Decay rate of MIF based on half-life                       | 0.6931  | $h^{-1}$ | (148-153)                  | Half-life ~1 hour                                                     |
| $d_{PGE2}$      | Decay rate of PGE2 based on half-life                      | 0.6931  | $h^{-1}$ | (148-153)                  | Half-life ~1 hour                                                     |
| $d_{GMCSF}$     | Decay rate of GM-CSF based on half-life                    | 0.6931  | $h^{-1}$ | (148-153)                  | Half-life ~1 hour                                                     |
| $d_{GCSF}$      | Decay rate of G-CSF based on half-life                     | 0.6931  | $h^{-1}$ | (148-153)                  | Half-life ~1 hour                                                     |
| $d_{SCF}$       | Decay rate of SCF based on half-life                       | 0.6931  | $h^{-1}$ | (148-153)                  | Half-life ~1 hour                                                     |
| $k_{QSC\_ASC}$  | Deactivation rate                                          | 1e-3    | $h^{-1}$ | Estimated(1, 131, 154-156) |                                                                       |
| $k_{ASC\_QSC}$  | Activation rate                                            | 5e-3    | $h^{-1}$ | Estimated(1, 131, 154-156) |                                                                       |
| $p_{ASC\_glio}$ | Probability of dividing glioma                             | 1e-4    |          | Estimated(                 |                                                                       |

|                               |                                                                            |      |                               |                  |  |
|-------------------------------|----------------------------------------------------------------------------|------|-------------------------------|------------------|--|
|                               | dedifferentiate to ASC during each cell cycle                              |      |                               | 5, 157-160)      |  |
| $p_{\text{glio\_ASC}}$        | Probability of dividing ASC differentiate to glioma during each cell cycle | 0.5  |                               | (161)            |  |
| $p_{\text{glio\_astro}}$      | Probability of dividing astrocyte mutate to glioma during each cell cycle  | 1E-6 |                               | (162-164)        |  |
| $k_{\text{IL1\_glio}}$        | Secretion rate of IL1 by glioma                                            | 60   | $10^{-21} \text{ mol h}^{-1}$ | (80-82)          |  |
| $k_{\text{IL1\_micro}}$       | Secretion rate of IL1 by microglia                                         | 22.1 | $10^{-21} \text{ mol h}^{-1}$ | (76, 78)         |  |
| $k_{\text{IL1\_astro}}$       | Secretion rate of IL1 by astrocyte                                         | 3    | $10^{-21} \text{ mol h}^{-1}$ | (76)             |  |
| $k_{\text{IL6\_glio}}$        | Secretion rate of IL6 by glioma                                            | 40   | $10^{-21} \text{ mol h}^{-1}$ | (29, 83-86)      |  |
| $k_{\text{IL6\_micro}}$       | Secretion rate of IL6 by microglia                                         | 96.2 | $10^{-21} \text{ mol h}^{-1}$ | (78, 88, 89)     |  |
| $k_{\text{IL6\_astro}}$       | Secretion rate of IL6 by astrocyte                                         | 6    | $10^{-21} \text{ mol h}^{-1}$ | (78, 87)         |  |
| $k_{\text{IL10\_micro}}$      | Secretion rate of IL10 by microglia                                        | 60   | $10^{-21} \text{ mol h}^{-1}$ | (33, 90)         |  |
| $k_{\text{TNF}\alpha\_micro}$ | Secretion rate of TNF $\alpha$ by microglia                                | 29.4 | $10^{-21} \text{ mol h}^{-1}$ | (30, 78, 91-93)  |  |
| $k_{\text{TNF}\alpha\_astro}$ | Secretion rate of TNF $\alpha$ by astrocyte                                | 2.94 | $10^{-21} \text{ mol h}^{-1}$ | (78, 94-96, 165) |  |
| $k_{\text{TGF}\beta\_ASC}$    | Secretion rate of TGF $\beta$ by ASC                                       | 0.15 | $10^{-21} \text{ mol h}^{-1}$ | (97)             |  |
| $k_{\text{TGF}\beta\_glio}$   | Secretion rate of TGF $\beta$ by glioma                                    | 40   | $10^{-21} \text{ mol h}^{-1}$ | (31)             |  |
| $k_{\text{TGF}\beta\_micro}$  | Secretion rate of TGF $\beta$ by microglia                                 | 60   | $10^{-21} \text{ mol h}^{-1}$ | (100-102)        |  |
| $k_{\text{EGF\_glio}}$        | Secretion rate of EGF by glioma                                            | 60   | $10^{-21} \text{ mol h}^{-1}$ | (104)            |  |
| $k_{\text{EGF\_micro}}$       | Secretion rate of EGF by microglia                                         | 60   | $10^{-21} \text{ mol h}^{-1}$ | (103)            |  |
| $k_{\text{VEGF\_ASC}}$        | Secretion rate of VEGF by ASC                                              | 30   | $10^{-21} \text{ mol h}^{-1}$ | (14, 105)        |  |
| $k_{\text{VEGF\_glio}}$       | Secretion rate of VEGF by glioma                                           | 60   | $10^{-21} \text{ mol h}^{-1}$ | (12, 13, 166)    |  |
| $k_{\text{VEGF\_micro}}$      | Secretion rate of VEGF by microglia                                        | 60   | $10^{-21} \text{ mol h}^{-1}$ | (13)             |  |
| $k_{\text{FGF\_ASC}}$         | Secretion rate of FGF by ASC                                               | 60   | $10^{-21} \text{ mol h}^{-1}$ | (107, 108)       |  |
| $k_{\text{FGF\_glio}}$        | Secretion rate of FGF by glioma                                            | 60   | $10^{-21} \text{ mol h}^{-1}$ | (5)              |  |
| $k_{\text{HGF\_glio}}$        | Secretion rate of HGF by glioma                                            | 60   | $10^{-21} \text{ mol h}^{-1}$ | (44, 109)        |  |
| $k_{\text{HGF\_micro}}$       | Secretion rate of HGF by microglia                                         | 60   | $10^{-21} \text{ mol h}^{-1}$ | (65)             |  |
| $k_{\text{MCP1\_glio}}$       | Secretion rate of MCP1 by glioma                                           | 90   | $10^{-21} \text{ mol h}^{-1}$ | (58-60)          |  |
| $k_{\text{MIF\_glio}}$        | Secretion rate of MIF by glioma                                            | 20   | $10^{-21} \text{ mol h}^{-1}$ | (110)            |  |
| $k_{\text{MIF\_micro}}$       | Secretion rate of MIF by microglia                                         | 15   | $10^{-21} \text{ mol h}^{-1}$ | (20)             |  |
| $k_{\text{PGE2\_micro}}$      | Secretion rate of PGE2 by microglia                                        | 60   | $10^{-21} \text{ mol h}^{-1}$ |                  |  |
| $k_{\text{GMCSF\_glio}}$      | Secretion rate of GM-CSF by glioma                                         | 60   | $10^{-21} \text{ mol h}^{-1}$ | (47, 49)         |  |
| $k_{\text{GMCSF\_micro}}$     | Secretion rate of GM-CSF by microglia                                      | 60   | $10^{-21} \text{ mol h}^{-1}$ |                  |  |
| $k_{\text{GCSF\_glio}}$       | Secretion rate of G-CSF by glioma                                          | 60   | $10^{-21} \text{ mol h}^{-1}$ | (47, 49)         |  |
| $k_{\text{SCF\_glio}}$        | Secretion rate of SCF by glioma                                            | 60   | $10^{-21} \text{ mol h}^{-1}$ | (50, 51)         |  |

|                  |                                    |    |                                |            |
|------------------|------------------------------------|----|--------------------------------|------------|
| $k_{SCF\_micro}$ | Secretion rate of SCF by microglia | 60 | $10^{-21}$ mol h <sup>-1</sup> | (118, 119) |
|------------------|------------------------------------|----|--------------------------------|------------|

**Supporting Table S2. Stochastic Parameters**

| Deterministic variable | Stochastic description                                                                                                                                                                        | Parameters                                                                                                                                                                                                       | Dimension                                                | Comment                                                                                                                                                            |
|------------------------|-----------------------------------------------------------------------------------------------------------------------------------------------------------------------------------------------|------------------------------------------------------------------------------------------------------------------------------------------------------------------------------------------------------------------|----------------------------------------------------------|--------------------------------------------------------------------------------------------------------------------------------------------------------------------|
| $r_{ASC}$              | $r(1+\varepsilon\sin(\Omega t+\sigma W(t)+\Delta))$<br><br>$r_{ASC}=0.0005$<br>$\varepsilon_{ASC}=0.99$<br>$\Omega_{ASC}=0.0045$<br>$\sigma_{ASC}=10$                                         | $r_{ASC}$ is the basal proliferation rate of ASC. $\varepsilon$ is the amplitude of stochastic fluctuation; $\sigma$ is the bandwidth factor ; $\Delta$ is a random phase uniformly distributed in $[0, 2\pi]$ . | $\Omega$ (h <sup>-1</sup> ),<br>Others are dimensionless | $r > 0$ ,<br>$0 \leq \varepsilon < 1$ ,<br>$\Omega = \frac{2\pi r_{ASC}}{\ln 2}$                                                                                   |
| $r_{glioma}$           | $r(1+\varepsilon\sin(\Omega t+\sigma W(t)+\Delta))$<br><br>$r_{glioma}=0.0174$<br>$\varepsilon_{glioma}=0.99$<br>$\Omega_{glioma}=0.1577$<br>$\sigma_{glioma}=10$                             | $r_{glioma}$ is the basal proliferation rate of glioma.                                                                                                                                                          | $\Omega$ (h <sup>-1</sup> ),<br>Others are dimensionless | $r > 0$ ,<br>$0 \leq \varepsilon < 1$ ,<br>$\Omega = \frac{2\pi r_{glioma}}{\ln 2}$                                                                                |
| $r_{astrocyte}$        | $r(1+\varepsilon\sin(\Omega t+\sigma W(t)+\Delta))$<br><br>$r_{astrocyte}=0.0174$<br>$\varepsilon_{astrocyte}=0.99$<br>$\Omega_{astrocyte}=0.1577$<br>$\sigma_{astrocyte}=10$                 | $r_{astrocyte}$ is the basal proliferation rate of astrocyte.                                                                                                                                                    | $\Omega$ (h <sup>-1</sup> ),<br>Others are dimensionless | $r > 0$ ,<br>$0 \leq \varepsilon < 1$ ,<br>$\Omega = \frac{2\pi r_{astrocyte}}{\ln 2}$                                                                             |
| $r_{microglia}$        | $r(1+\varepsilon\sin(\Omega t+\sigma W(t)+\Delta))$<br><br>$r_{microglia}=0.0174$<br>$\varepsilon_{microglia}=0.99$<br>$\Omega_{microglia}=0.1577$<br>$\sigma_{microglia}=10$                 | $r_{microglia}$ is the basal proliferation rate of microglia.                                                                                                                                                    | $\Omega$ (h <sup>-1</sup> ),<br>Others are dimensionless | $r > 0$ ,<br>$0 \leq \varepsilon < 1$ ,<br>$\Omega = \frac{2\pi r_{microglia}}{\ln 2}$                                                                             |
| $p_{glio\_astro}$      | $p(1+\varepsilon\sin(\Omega t+\sigma W(t)+\Delta));$<br><br>$p_{glio\_astro}=1 \times 10^{-6}$<br>$\varepsilon_{glio\_astro}=1$<br>$\Omega_{glio\_astro}=0.1577$<br>$\sigma_{glio\_astro}=10$ | $p_{glio\_astro}$ is the average proportion of dividing astrocyte mutate to glioma during each cell cycle;                                                                                                       | $\Omega$ (h <sup>-1</sup> ),<br>Others are dimensionless | $0 \leq p \leq 1$ ,<br>$0 \leq \varepsilon \leq \min\left(1, \frac{1}{p} - 1\right)$<br>$\Omega = \frac{2\pi}{T_{cell\ cycle}} = \frac{2\pi r_{astrocyte}}{\ln 2}$ |
| $p_{glio\_ASC}$        | $p(1+\varepsilon\sin(\Omega t+\sigma W(t)+\Delta));$<br><br>$p_{glio\_ASC}=0.5$                                                                                                               | $p_{glio\_ASC}$ is the average proportion of dividing ASC differentiate to                                                                                                                                       | $\Omega$ (h <sup>-1</sup> ),<br>Others are dimensionless | $0 \leq p \leq 1$ ,<br>$0 \leq \varepsilon \leq \min\left(1, \frac{1}{p} - 1\right)$                                                                               |

|                        |                                                                                                                                                                                                                       |                                                                                                                                                                                                                                                                                                                |                                                           |                                                                                                                                                                                 |
|------------------------|-----------------------------------------------------------------------------------------------------------------------------------------------------------------------------------------------------------------------|----------------------------------------------------------------------------------------------------------------------------------------------------------------------------------------------------------------------------------------------------------------------------------------------------------------|-----------------------------------------------------------|---------------------------------------------------------------------------------------------------------------------------------------------------------------------------------|
|                        | $\varepsilon_{\text{glio\_ASC}}=1$<br>$\Omega_{\text{glio\_ASC}}=0.0045$<br>$\sigma_{\text{glio\_ASC}}=10$                                                                                                            | glioma during each cell cycle.                                                                                                                                                                                                                                                                                 | ess                                                       | $\Omega = \frac{2\pi}{T_{\text{cell cycle}}} = \frac{2\pi r_{\text{ASC}}}{\ln 2}$                                                                                               |
| $p_{\text{ASC\_glio}}$ | $p(1+\varepsilon\sin(\Omega t+\sigma W(t)+\Delta));$<br><br>$p_{\text{ASC\_glio}}=1 \times 10^{-4}$<br>$\varepsilon_{\text{ASC\_glio}}=1$<br>$\Omega_{\text{ASC\_glio}}=0.1577$<br>$\sigma_{\text{ASC\_glio}}=10$     | $p_{\text{ASC\_glio}}$ is the average proportion of dividing glioma dedifferentiate to ASC during each cell cycle.                                                                                                                                                                                             | $\Omega$ ( $\text{h}^{-1}$ ),<br>Others are dimensionless | $0 \leq p \leq 1,$<br>$0 \leq \varepsilon \leq \min\left(1, \frac{1}{p} - 1\right)$<br><br>$\Omega = \frac{2\pi}{T_{\text{cell cycle}}} = \frac{2\pi r_{\text{glioma}}}{\ln 2}$ |
| $c_{\text{QSC}}$       | $\xi(t) = \sum_{k=1}^{N(t)} Y_k \delta(t - \tau_k);$<br><br>$Y_k=1;$<br>$\lambda=c_{\text{QSC}}=1;$                                                                                                                   | $c_{\text{QSC}}$ is the average rate of supply of quiescent glioma stem cell from normal neural stem cell;<br>$\xi(t)$ is Poisson white noise;<br>$N(t)$ is Poisson counting process giving the number of pulses that arrive in the time interval $[0, t]$ ;<br>$\lambda$ is the mean arrival rate of $N(t)$ ; |                                                           |                                                                                                                                                                                 |
| $c_{\text{microglia}}$ | $\xi(t) = \sum_{k=1}^{N(t)} Y_k \delta(t - \tau_k);$<br><br>$Y_k=1;$<br>$\lambda=$<br>$c_{\text{microglia}} \left( 1 + \frac{u_{\text{micro\_MCP1}} y_{\text{MCP1}}}{s_{\text{MCP1}} + y_{\text{MCP1}}} \right)$<br>; | $c_{\text{microglia}}$ is the average rate of supply of microglia from monocytes;                                                                                                                                                                                                                              |                                                           |                                                                                                                                                                                 |
| $c_{\text{astrocyte}}$ | $\xi(t) = \sum_{k=1}^{N(t)} Y_k \delta(t - \tau_k);$<br><br>$Y_k=1;$<br>$\lambda=c_{\text{astrocyte}};$                                                                                                               | $c_{\text{astrocyte}}$ is the average rate of supply of astrocyte from progenitors;                                                                                                                                                                                                                            |                                                           |                                                                                                                                                                                 |
| $k_i$                  | $k_i \max(0, 1 + \sigma N(0, 1))$                                                                                                                                                                                     | Truncated normal distribution                                                                                                                                                                                                                                                                                  |                                                           |                                                                                                                                                                                 |

1. Greco V, *et al.* (2009) A Two-Step Mechanism for Stem Cell Activation during Hair Regeneration. *Cell Stem Cell* 4(2):155-169.
2. Kelly JJP, *et al.* (2009) Proliferation of Human Glioblastoma Stem Cells Occurs Independently of Exogenous Mitogens. *Stem Cells* 27(8):1722-1733.
3. Hermanson O, Jepsen K, & Rosenfeld MG (2002) N-CoR controls differentiation of neural stem cells into astrocytes. *Nature* 419(6910):934-939.
4. Wang H, *et al.* (2009) Targeting Interleukin 6 Signaling Suppresses Glioma Stem Cell Survival and Tumor Growth. *Stem Cells* 27(10):2393-2404.
5. Allerstorfer S, *et al.* (2008) FGF5 as an oncogenic factor in human glioblastoma multiforme: autocrine and paracrine activities. *Oncogene* 27(30):4180-4190.
6. Schmidt NO, *et al.* (1999) Levels of vascular endothelial growth factor, hepatocyte growth factor scatter factor and basic fibroblast growth factor in human gliomas and their relation to angiogenesis. *International Journal of Cancer* 84(1):10-18.
7. Sunderkotter C, Steinbrink K, Goebeler M, Bhardwaj R, & Sorg C (1994) MACROPHAGES AND ANGIOGENESIS. *Journal of Leukocyte Biology* 55(3):410-422.
8. Voronov E, *et al.* (2003) IL-1 is required for tumor invasiveness and angiogenesis. *Proceedings of the National Academy of Sciences of the United States of America* 100(5):2645-2650.
9. Abounader R & Lattera J (2005) Scatter factor/hepatocyte growth factor in brain tumor growth and angiogenesis. *Neuro-Oncology* 7(4):436-451.
10. Bacher M, *et al.* (2003) Up-regulation of macrophage migration inhibitory factor gene and protein expression in glial tumor cells during hypoxic and hypoglycemic stress indicates a critical role for angiogenesis in glioblastoma multiforme. *American Journal of Pathology* 162(1):11-17.
11. Saijo Y, *et al.* (2002) Proinflammatory cytokine IL-1 beta promotes tumor growth of Lewis lung carcinoma by induction of angiogenic factors: In vivo analysis of tumor-stromal interaction. *Journal of Immunology* 169(1):469-475.
12. Tsai JC, Goldman CK, & Gillespie GY (1995) VASCULAR ENDOTHELIAL GROWTH-FACTOR IN HUMAN GLIOMA CELL-LINES - INDUCED SECRETION BY EGF, PDGF-BB, AND BFGF. *J. Neurosurg.* 82(5):864-873.
13. Lafuente JV, *et al.* (1999) Expression of vascular endothelial growth factor (VEGF) and platelet-derived growth factor receptor-beta (PDGFR-beta) in human gliomas. *Journal of Molecular Neuroscience* 13(1-2):177-185.
14. Yao XH, *et al.* (2008) Glioblastoma stem cells produce vascular endothelial growth factor by activation of a G-protein coupled formylpeptide receptor FPR. *Journal of Pathology* 215(4):369-376.
15. Stefanik DF, Rizkalla LR, Soi A, Goldblatt SA, & Rizkalla WM (1991) ACIDIC AND BASIC FIBROBLAST GROWTH-FACTORS ARE PRESENT IN GLIOBLASTOMA-MULTIFORME. *Cancer Research* 51(20):5760-5765.
16. Takahashi JA, *et al.* (1992) CORRELATION OF BASIC FIBROBLAST GROWTH-FACTOR EXPRESSION LEVELS WITH THE DEGREE OF MALIGNANCY AND VASCULARITY IN HUMAN GLIOMAS. *J. Neurosurg.* 76(5):792-798.
17. Stan AC, Nemati MN, Pietsch T, Walter GF, & Dietz H (1995) IN-VIVO INHIBITION OF ANGIOGENESIS AND GROWTH OF THE HUMAN U-87 MALIGNANT GLIAL TUMOR BY TREATMENT WITH AN ANTIBODY AGAINST BASIC FIBROBLAST GROWTH-FACTOR. *J. Neurosurg.* 82(6):1044-1052.
18. Dunn IF, Heese O, & Black PM (2000) Growth factors in glioma angiogenesis: FGFs, PDGF, EGF, and TGFs. *Journal of Neuro-Oncology* 50(1-2):121-137.



19. Krockenberger M, *et al.* (2008) Macrophage migration inhibitory factor contributes to the immune escape of ovarian cancer by down-regulating NKG2D. *Journal of Immunology* 180(11):7338-7348.
20. Bach JP, *et al.* (2009) The Role of Macrophage Inhibitory Factor in Tumorigenesis and Central Nervous System Tumors. *Cancer* 115(10):2031-2040.
21. Sun LX, *et al.* (2006) Neuronal and glioma-derived stem cell factor induces angiogenesis within the brain. *Cancer Cell* 9(4):287-300.
22. Fan XL, Salford LG, & Widegren B (2007) Glioma stem cells: Evidence and limitation. *Seminars in Cancer Biology* 17(3):214-218.
23. Holland EC, Hively WP, DePinho RA, & Varmus HE (1998) A constitutively active epidermal growth factor receptor cooperates with disruption of G(1) cell-cycle arrest pathways to induce glioma-like lesions in mice. (Translated from English) *Genes Dev.* 12(23):3675-3685 (in English).
24. Engebraaten O, Bjerkvig R, Pedersen PH, & Laerum OD (1993) EFFECTS OF EGF, BFGF, NGF AND PDGF(BB) ON CELL PROLIFERATIVE, MIGRATORY AND INVASIVE CAPACITIES OF HUMAN BRAIN-TUMOR BIOPSIES INVITRO. *International Journal of Cancer* 53(2):209-214.
25. Loilome W, *et al.* (2009) Glioblastoma cell growth is suppressed by disruption of fibroblast growth factor pathway signaling. *Journal of Neuro-Oncology* 94(3):359-366.
26. Dancey JE & Freidlin B (2003) Targeting epidermal growth factor receptor - are we missing the mark? *Lancet* 362(9377):62-64.
27. Gadji M, *et al.* (2009) EGF receptor inhibitors in the treatment of glioblastoma multiforme: Old clinical allies and newly emerging therapeutic concepts. *European Journal of Pharmacology* 625(1-3):23-30.
28. Loew S, Schmidt U, Unterberg A, & Halatsch ME (2009) The Epidermal Growth Factor Receptor as a Therapeutic Target in Glioblastoma Multiforme and other Malignant Neoplasms. (Translated from English) *Anti-Cancer Agents Med. Chem.* 9(6):703-715 (in English).
29. Goswami S, Gupta A, & Sharma SK (1998) Interleukin-6-mediated autocrine growth promotion in human glioblastoma multiforme cell line U87MG. *Journal of Neurochemistry* 71(5):1837-1845.
30. Hao CH, *et al.* (2002) Cytokine and cytokine receptor mRNA expression in human glioblastomas: evidence of Th1, Th2 and Th3 cytokine dysregulation. *Acta Neuropathol.* 103(2):171-178.
31. Constam DB, *et al.* (1992) DIFFERENTIAL EXPRESSION OF TRANSFORMING GROWTH FACTOR-BETA-1, FACTOR-BETA-2, AND FACTOR-BETA-3 BY GLIOBLASTOMA CELLS, ASTROCYTES, AND MICROGLIA. *Journal of Immunology* 148(5):1404-1410.
32. Olofsson A, *et al.* (1992) TRANSFORMING GROWTH FACTOR-BETA-1, FACTOR-BETA-2, AND FACTOR-BETA-3 SECRETED BY A HUMAN GLIOBLASTOMA CELL-LINE - IDENTIFICATION OF SMALL AND DIFFERENT FORMS OF LARGE LATENT COMPLEXES. *Journal of Biological Chemistry* 267(27):19482-19488.
33. Huettner C, Czub S, Kerkau S, Roggendorf W, & Tonn JC (1997) Interleukin 10 is expressed in human gliomas in vivo and increases glioma cell proliferation and motility in vitro. *Anticancer Research* 17(5A):3217-3224.
34. Libermann TA, *et al.* (1985) AMPLIFICATION AND OVEREXPRESSION OF THE EGF RECEPTOR GENE IN PRIMARY HUMAN GLIOBLASTOMAS. *Journal of Cell Science*:161-172.
35. Helseth E, *et al.* (1988) Amplification of the epidermal growth factor receptor gene in biopsy specimens from human intracranial tumours. *Br J Neurosurg* 2(2):217-225.
36. Steck PA, Lee P, Hung MC, & Yung WKA (1988) EXPRESSION OF AN ALTERED EPIDERMAL GROWTH-FACTOR RECEPTOR BY HUMAN GLIOBLASTOMA CELLS. *Cancer Research* 48(19):5433-5439.

37. Andersson A, Holmberg A, Carlsson J, Ponten J, & Westermark B (1991) BINDING OF EPIDERMAL GROWTH FACTOR-DEXTRAN CONJUGATES TO CULTURED GLIOMA-CELLS. *International Journal of Cancer* 47(3):439-444.
38. Prahli M, Nederman T, Carlsson J, & Sjodin L (1991) BINDING OF EPIDERMAL GROWTH-FACTOR (EGF) TO A CULTURED HUMAN GLIOMA CELL-LINE. *Journal of Receptor Research* 11(5):791-812.
39. Torp SH, Helseth E, Dalen A, & Unsgaard G (1991) EPIDERMAL GROWTH-FACTOR RECEPTOR EXPRESSION IN HUMAN GLIOMAS. *Cancer Immunology Immunotherapy* 33(1):61-64.
40. Kleihues P, Soylemezoglu F, Schauble B, Scheithauer BW, & Burger PC (1995) HISTOPATHOLOGY, CLASSIFICATION, AND GRADING OF GLIOMAS. *Glia* 15(3):211-221.
41. Adachi K, *et al.* (1992) ENHANCEMENT OF EPIDERMAL GROWTH-FACTOR RECEPTOR EXPRESSION ON GLIOMA-CELLS BY RECOMBINANT TUMOR-NECROSIS-FACTOR-ALPHA. *Cancer Immunology Immunotherapy* 34(6):370-376.
42. Kunkel P, *et al.* (2001) Inhibition of glioma angiogenesis and growth in vivo by systemic treatment with a monoclonal antibody against vascular endothelial growth factor receptor-2. *Cancer Research* 61(18):6624-6628.
43. Ryuto M, *et al.* (1996) Induction of vascular endothelial growth factor by tumor necrosis factor alpha in human glioma cells - Possible roles of SP-1. *Journal of Biological Chemistry* 271(45):28220-28228.
44. Kunkel P, *et al.* (2001) Expression and localization of scatter factor/hepatocyte growth factor in human astrocytomas. *Neuro-Oncology* 3(2):82-88.
45. Jeffers M, Rong S, & VandeWoude GF (1996) Hepatocyte growth factor scatter factor Met signaling in tumorigenicity and invasion/metastasis. *Journal of Molecular Medicine* 74(9):505-513.
46. Koochekpour S, *et al.* (1997) Met and hepatocyte growth factor scatter factor expression in human gliomas. *Cancer Research* 57(23):5391-5398.
47. Nitta T, *et al.* (1992) EXPRESSION OF GRANULOCYTE COLONY STIMULATING FACTOR AND GRANULOCYTE-MACROPHAGE COLONY STIMULATING FACTOR GENES IN HUMAN ASTROCYTOMA CELL-LINES AND IN GLIOMA SPECIMENS. *Brain Research* 571(1):19-25.
48. Tada M, Diserens AC, Desbaillets I, & Detribolet N (1994) ANALYSIS OF CYTOKINE RECEPTOR MESSENGER-RNA EXPRESSION IN HUMAN GLIOBLASTOMA CELLS AND NORMAL ASTROCYTES BY REVERSE-TRANSCRIPTION POLYMERASE CHAIN-REACTION. *J. Neurosurg.* 80(6):1063-1073.
49. Mueller MM, *et al.* (1999) Autocrine growth regulation by granulocyte colony-stimulating factor and granulocyte macrophage colony-stimulating factor in human gliomas with tumor progression. *American Journal of Pathology* 155(5):1557-1567.
50. Stanulla M, Welte K, Hadam MR, & Pietsch T (1995) COEXPRESSION OF STEM-CELL FACTOR AND ITS RECEPTOR C-KIT IN HUMAN-MALIGNANT GLIOMA CELL-LINES. *Acta Neuropathol.* 89(2):158-165.
51. Hamel W & Westphal M (1997) The road less travelled: c-kit and stem cell factor. *Journal of Neuro-Oncology* 35(3):327-333.
52. Berdel WE, *et al.* (1992) RECOMBINANT HUMAN STEM-CELL FACTOR STIMULATES GROWTH OF A HUMAN GLIOBLASTOMA CELL-LINE EXPRESSING C-KIT PROTOONCOGENE. *Cancer Research* 52(12):3498-3502.
53. Takahashi N, *et al.* (1998) Involvement of macrophage migration inhibitory factor (MIF) in the mechanism of tumor cell growth. *Molecular Medicine* 4(11):707-714.
54. Ren Y, *et al.* (2004) Upregulation of macrophage migration inhibitory factor contributes to induced N-Myc expression by the activation of ERK signaling pathway and increased expression of interleukin-8 and VEGF in neuroblastoma. *Oncogene* 23(23):4146-4154.

55. Fingerle-Rowson G, *et al.* (2003) The p53-dependent effects of macrophage migration inhibitory factor revealed by gene targeting. *Proceedings of the National Academy of Sciences of the United States of America* 100(16):9354-9359.
56. Westphal M, Neuss M, & Herrmann HD (1986) PROSTAGLANDINS - ANTIPROLIFERATIVE EFFECT OF PGD<sub>2</sub> ON CULTURED HUMAN GLIOMA-CELLS. *Acta Neurochirurgica* 83(1-2):56-61.
57. Guillemin GJ & Brew BJ (2004) Microglia, macrophages, perivascular macrophages, and pericytes: a review of function and identification. *Journal of Leukocyte Biology* 75(3):388-397.
58. Leung SY, Wong MP, Chung LP, Chan ASY, & Yuen ST (1997) Monocyte chemoattractant protein-1 expression and macrophage infiltration in gliomas. (Translated from English) *Acta Neuropathol.* 93(5):518-527 (in English).
59. Prat E, *et al.* (2000) The human astrocytoma cell line U373MG produces monocyte chemotactic protein (MCP)-1 upon stimulation with beta-amyloid protein. (Translated from English) *Neurosci. Lett.* 283(3):177-180 (in English).
60. Takeshima H, Kuratsu JI, Takeya M, Yoshimura T, & Ushio Y (1994) EXPRESSION AND LOCALIZATION OF MESSENGER-RNA AND PROTEIN FOR MONOCYTE CHEMOATTRACTANT PROTEIN-1 IN HUMAN-MALIGNANT GLIOMA. (Translated from English) *J. Neurosurg.* 80(6):1056-1062 (in English).
61. Galasso JM, *et al.* (2000) Experimental gliosarcoma induces chemokine receptor expression in rat brain. *Experimental Neurology* 161(1):85-95.
62. Platten M, *et al.* (2003) Monocyte chemoattractant protein-1 increases microglial infiltration and aggressiveness of gliomas. *Annals of Neurology* 54(3):388-392.
63. Nolte C, Kirchhoff F, & Kettenmann H (1997) Epidermal growth factor is a motility factor for microglial cells in vitro: Evidence for EGF receptor expression. *European Journal of Neuroscience* 9(8):1690-1698.
64. Forstreuter F, Lucius R, & Mentlein R (2002) Vascular endothelial growth factor induces chemotaxis and proliferation of microglial cells. *Journal of Neuroimmunology* 132(1-2):93-98.
65. Zhang LL, Himi T, & Murota SI (2000) Induction of hepatocyte growth factor (HGF) in rat microglial cells by prostaglandin E-2. *Journal of Neuroscience Research* 62(3):389-395.
66. Badie B, Schartner J, Klaver J, & Vorpahl J (1999) In vitro modulation of microglia motility by glioma cells is mediated by hepatocyte growth factor scatter factor. *Neurosurgery* 44(5):1077-1082.
67. Giulian D & Ingeman JE (1988) COLONY-STIMULATING FACTORS AS PROMOTERS OF AMEBOID MICROGLIA. *Journal of Neuroscience* 8(12):4707-4717.
68. Suzumura A, Sawada M, Yamamoto H, & Marunouchi T (1993) TRANSFORMING GROWTH-FACTOR-BETA SUPPRESSES ACTIVATION AND PROLIFERATION OF MICROGLIA IN-VITRO. *Journal of Immunology* 151(4):2150-2158.
69. Zhang SC & Fedoroff S (1998) Modulation of microglia by stem cell factor. *Journal of Neuroscience Research* 53(1):29-37.
70. Suzuki SO & Goldman JE (2003) Multiple cell populations in the early postnatal subventricular zone take distinct migratory pathways: A dynamic study of glial and neuronal progenitor migration. (Translated from English) *Journal of Neuroscience* 23(10):4240-4250 (in English).
71. Giulian D & Lachman LB (1985) INTERLEUKIN-1 STIMULATION OF ASTROGLIAL PROLIFERATION AFTER BRAIN INJURY. *Science* 228(4698):497-499.
72. Giulian D, Young DG, Woodward J, Brown DC, & Lachman LB (1988) INTERLEUKIN-1 IS AN ASTROGLIAL GROWTH-FACTOR IN THE DEVELOPING BRAIN. *Journal of Neuroscience* 8(2):709-714.

73. Giulian D & Baker TJ (1985) PEPTIDES RELEASED BY AMEBOID MICROGLIA REGULATE ASTROGLIAL PROLIFERATION. (Translated from English) *Journal of Cell Biology* 101(6):2411-2415 (in English).
74. Cuny E, *et al.* (2002) Association of elevated glial expression of interleukin-1 beta with improved survival in patients with glioblastomas multiforme. *J. Neurosurg.* 96(2):294-301.
75. Zhang D, *et al.* (2009) Prostaglandin E2 released from activated microglia enhances astrocyte proliferation in vitro. *Toxicology and Applied Pharmacology* 238(1):64-70.
76. Giulian D, Baker TJ, Shih LCN, & Lachman LB (1986) INTERLEUKIN-1 OF THE CENTRAL-NERVOUS-SYSTEM IS PRODUCED BY AMEBOID MICROGLIA. *Journal of Experimental Medicine* 164(2):594-604.
77. Giulian D & Baker TJ (1986) CHARACTERIZATION OF AMEBOID MICROGLIA ISOLATED FROM DEVELOPING MAMMALIAN BRAIN. *Journal of Neuroscience* 6(8):2163-2178.
78. Lee SC, Liu W, Dickson DW, Brosnan CF, & Berman JW (1993) CYTOKINE PRODUCTION BY HUMAN FETAL MICROGLIA AND ASTROCYTES - DIFFERENTIAL INDUCTION BY LIPOPOLYSACCHARIDE AND IL-1-BETA. *Journal of Immunology* 150(7):2659-2667.
79. Fontana A, Kristensen F, Dubs R, Gemsa D, & Weber E (1982) PRODUCTION OF PROSTAGLANDIN-E AND AN INTERLEUKIN-1 LIKE FACTOR BY CULTURED ASTROCYTES AND C6 GLIOMA-CELLS. *Journal of Immunology* 129(6):2413-2419.
80. Fontana A, Hengartner H, Detribolet N, & Weber E (1984) GLIOBLASTOMA CELLS RELEASE INTERLEUKIN-1 AND FACTORS INHIBITING INTERLEUKIN-2-MEDIATED EFFECTS. *Journal of Immunology* 132(4):1837-1844.
81. Gauthier T, *et al.* (1993) EXPRESSION AND RELEASE OF INTERLEUKIN-1 BY HUMAN GLIOBLASTOMA CELLS-INVITRO AND INVIVO. *Acta Neurochirurgica* 121(3-4):199-205.
82. Lee JC, Simon PL, & Young PR (1989) CONSTITUTIVE AND PMA-INDUCED INTERLEUKIN-1 PRODUCTION BY THE HUMAN ASTROCYTOMA CELL-LINE T24. *Cellular Immunology* 118(2):298-311.
83. Cinque S, Willems J, Depraetere S, Vermeire L, & Joniau M (1992) INVITRO EFFECT OF INTERLEUKIN-1-BETA ON HUMAN GLIOMA CELL-LINES - REGULATION OF CELL-PROLIFERATION AND IL-6 PRODUCTION. *Immunology Letters* 34(3):267-271.
84. Nitta T & Sato K (1994) Expression of interleukin-6 gene in human astrocyte cell lineages. *J Clin Neurosci* 1(1):53-57.
85. Van Meir E, Sawamura Y, Diserens AC, Hamou MF, & Detribolet N (1990) HUMAN GLIOBLASTOMA CELLS RELEASE INTERLEUKIN-6 INVIVO AND INVITRO. *Cancer Research* 50(20):6683-6688.
86. Yamanaka R, Tanaka R, & Yoshida S (1993) Effects of irradiation on cytokine production in glioma cells lines. *Neurologia Medico-Chirurgica* 33(11):744-748.
87. Benveniste EN, Sparacio SM, Norris JG, Grenett HE, & Fuller GM (1990) INDUCTION AND REGULATION OF INTERLEUKIN-6 GENE-EXPRESSION IN RAT ASTROCYTES. *Journal of Neuroimmunology* 30(2-3):201-212.
88. Jang S, Kelley KW, & Johnson RW (2008) Luteolin reduces IL-6 production in microglia by inhibiting JNK phosphorylation and activation of AP-1. *Proceedings of the National Academy of Sciences of the United States of America* 105(21):7534-7539.
89. Nakanishi M, *et al.* (2007) Microglia-derived interleukin-6 and leukaemia inhibitory factor promote astrocytic differentiation of neural stem/progenitor cells. *European Journal of Neuroscience* 25(3):649-658.
90. Wagner S, *et al.* (1999) Microglial macrophage expression of interleukin 10 in human glioblastomas. *International Journal of Cancer* 82(1):12-16.

91. Roessler K, *et al.* (1995) DETECTION OF TUMOR NECROSIS FACTOR-EX PROTEIN AND MESSENGER-RNA IN HUMAN GLIAL BRAIN-TUMORS - COMPARISON OF IMMUNOHISTOCHEMISTRY WITH IN-SITU HYBRIDIZATION USING MOLECULAR PROBES. *J. Neurosurg.* 83(2):291-297.
92. Martin FC, Anton PA, Gornbein JA, Shanahan F, & Merrill JE (1993) PRODUCTION OF INTERLEUKIN-1 BY MICROGLIA IN RESPONSE TO SUBSTANCE-P - ROLE FOR A NONCLASSICAL NK-1 RECEPTOR. *Journal of Neuroimmunology* 42(1):53-60.
93. Lubernarod J, Kage R, & Leeman SE (1994) SUBSTANCE-P ENHANCES THE SECRETION OF TUMOR-NECROSIS-FACTOR-ALPHA FROM NEUROGLIAL CELLS STIMULATED WITH LIPOPOLYSACCHARIDE. *Journal of Immunology* 152(2):819-824.
94. Chung IY, Norris JG, & Benveniste EN (1991) DIFFERENTIAL TUMOR-NECROSIS-FACTOR-ALPHA EXPRESSION BY ASTROCYTES FROM EXPERIMENTAL ALLERGIC ENCEPHALOMYELITIS-SUSCEPTIBLE AND ENCEPHALOMYELITIS-RESISTANT RAT STRAINS. *Journal of Experimental Medicine* 173(4):801-811.
95. Chung IY & Benveniste EN (1990) TUMOR NECROSIS FACTOR-ALPHA PRODUCTION BY ASTROCYTES - INDUCTION BY LIPOPOLYSACCHARIDE, IFN-GAMMA, AND IL-1-BETA. *Journal of Immunology* 144(8):2999-3007.
96. Kim HM, *et al.* (2002) Inhibition of tumour necrosis factor-alpha secretion from rat astrocytes by Sesim-Tang. *Phytotherapy Research* 16(1):28-32.
97. Wu A, *et al.* (2010) Glioma cancer stem cells induce immunosuppressive macrophages/microglia. *Neuro-Oncology* 12(11):1113-1125.
98. Naganuma H, *et al.* (1996) Modulation of transforming growth factor-beta secretion from malignant glioma cells by interleukin-1-beta. *Neurologia Medico-Chirurgica* 36(3):145-150, 189.
99. Naganuma H, *et al.* (1998) Down-regulation of transforming growth factor-beta and interleukin-10 secretion from malignant glioma cells by cytokines and anticancer drugs. *Journal of Neuro-Oncology* 39(3):227-236.
100. Lindholm D, Castren E, Kiefer R, Zafra F, & Thoenen H (1992) TRANSFORMING GROWTH FACTOR-BETA-1 IN THE RAT-BRAIN - INCREASE AFTER INJURY AND INHIBITION OF ASTROCYTE PROLIFERATION. *Journal of Cell Biology* 117(2):395-400.
101. Kiefer R, Supler ML, Toyka KV, & Streit WJ (1994) IN-SITU DETECTION OF TRANSFORMING GROWTH-FACTOR-BETA MESSENGER-RNA IN EXPERIMENTAL RAT GLIOMA AND REACTIVE GLIAL-CELLS. *Neurosci. Lett.* 166(2):161-164.
102. Wesolowska A, *et al.* (2008) Microglia-derived TGF-beta as an important regulator of glioblastoma invasion - an inhibition of TGF-beta-dependent effects by shRNA against human TGF-beta type II receptor. *Oncogene* 27(7):918-930.
103. Briers TW, Desmaretz C, & Vanmechelen E (1994) GENERATION AND CHARACTERIZATION OF MOUSE MICROGLIAL CELL-LINES. *Journal of Neuroimmunology* 52(2):153-164.
104. Mishima K, *et al.* (1998) Heparin-binding epidermal growth factor-like growth factor stimulates mitogenic signaling and is highly expressed in human malignant gliomas. *Acta Neuropathol.* 96(4):322-328.
105. Bao SD, *et al.* (2006) Stem cell-like glioma cells promote tumor angiogenesis through vascular endothelial growth factor. *Cancer Research* 66(16):7843-7848.
106. Munaut C, Boniver J, Foidart JM, & Deprez M (2002) Macrophage migration inhibitory factor (MIF) expression in human glioblastomas correlates with vascular endothelial growth factor (VEGF) expression. *Neuropathology and Applied Neurobiology* 28(6):452-460.
107. Pelton TA, Sharma S, Schulz TC, Rathjen J, & Rathjen PD (2002) Transient pluripotent cell populations during primitive ectoderm formation: correlation of in vivo and in vitro pluripotent cell development. *Journal of Cell Science* 115(2):329-339.

108. Dvorak P, *et al.* (2005) Expression and potential role of fibroblast growth factor 2 and its receptors in human embryonic stem cells. *Stem Cells* 23(8):1200-1211.
109. Yamada T, *et al.* (1994) IMMUNOHISTOCHEMISTRY WITH ANTIBODIES TO HEPATOCYTE GROWTH-FACTOR AND ITS RECEPTOR PROTEIN (C-MET) IN HUMAN BRAIN-TISSUES. *Brain Research* 637(1-2):308-312.
110. Piette C, *et al.* (2009) The Dexamethasone-induced Inhibition of Proliferation, Migration, and Invasion in Glioma Cell Lines Is Antagonized by Macrophage Migration Inhibitory Factor (MIF) and Can Be Enhanced by Specific MIF Inhibitors. *Journal of Biological Chemistry* 284(47):32483-32492.
111. Calandra T, Bernhagen J, Mitchell RA, & Bucala R (1994) MACROPHAGE IS AN IMPORTANT AND PREVIOUSLY UNRECOGNIZED SOURCE OF MACROPHAGE-MIGRATION INHIBITORY FACTOR. *Journal of Experimental Medicine* 179(6):1895-1902.
112. Badie B, *et al.* (2003) Microglia cyclooxygenase-2 activity in experimental gliomas: Possible role in cerebral edema formation. *Clin. Cancer Res.* 9(2):872-877.
113. Yamanaka R, Tanaka R, Saitoh T, & Okoshi S (1994) CYTOKINE GENE-EXPRESSION ON GLIOMA CELL-LINES AND SPECIMENS. *Journal of Neuro-Oncology* 21(3):243-247.
114. Frei K, *et al.* (1992) GRANULOCYTE-MACROPHAGE COLONY-STIMULATING FACTOR (GM-CSF) PRODUCTION BY GLIOBLASTOMA CELLS - DESPITE THE PRESENCE OF INDUCING SIGNALS GM-CSF IS NOT EXPRESSED INVIVO. *Journal of Immunology* 148(10):3140-3146.
115. Malefyt RD, Abrams J, Bennett B, Figdor CG, & Devries JE (1991) INTERLEUKIN-10(IL-10) INHIBITS CYTOKINE SYNTHESIS BY HUMAN MONOCYTES - AN AUTOREGULATORY ROLE OF IL-10 PRODUCED BY MONOCYTES. (Translated from English) *Journal of Experimental Medicine* 174(5):1209-1220 (in English).
116. Moore KW, Malefyt RD, Coffman RL, & O'Garra A (2001) Interleukin-10 and the interleukin-10 receptor. *Annual Review of Immunology* 19:683-765.
117. Thomassen MJ, *et al.* (2003) Elevated IL-10 inhibits GM-CSF synthesis in pulmonary alveolar proteinosis. *Autoimmunity* 36(5):285-290.
118. Zhang SC & Fedoroff S (1997) Cellular localization of stem cell factor and c-kit receptor in the mouse nervous system. *Journal of Neuroscience Research* 47(1):1-15.
119. Zhang SC & Fedoroff S (1999) Expression of stem cell factor and c-kit receptor in neural cells after brain injury. *Acta Neuropathol.* 97(4):393-398.
120. Chen RH, *et al.* (2010) A Hierarchy of Self-Renewing Tumor-Initiating Cell Types in Glioblastoma. *Cancer Cell* 17(4):362-375.
121. Wei J, *et al.* (2010) Glioma-Associated Cancer-Initiating Cells Induce Immunosuppression. (Translated from English) *Clin. Cancer Res.* 16(2):461-473 (in English).
122. Hussain SF, *et al.* (2006) The role of human glioma-infiltrating microglia/macrophages in mediating antitumor immune responses. *Neuro-Oncology* 8(3):261-279.
123. Saura J (2007) Microglial cells in astroglial cultures: a cautionary note. *Journal of Neuroinflammation* 4.
124. Ignacio AR, Muller YMR, Carvalho MSL, & Nazari EM (2005) Distribution of microglial cells in the cerebral hemispheres of embryonic and neonatal chicks. *Brazilian Journal of Medical and Biological Research* 38(11):1615-1621.
125. Lyck L, Bulavina, L., and Finsen, B. (2009) New parameters for analysis of changes microglial morphology using stereology and histomorphometry. *FASEB J.* 23.
126. Azevedo FAC, *et al.* (2009) Equal Numbers of Neuronal and Nonneuronal Cells Make the Human Brain an Isometrically Scaled-Up Primate Brain. *Journal of Comparative Neurology* 513(5):532-541.

127. Pelvig DP, Pakkenberg H, Stark AK, & Pakkenberg B (2008) Neocortical glial cell numbers in human brains. *Neurobiology of Aging* 29(11):1754-1762.
128. Allen NJ & Barres BA (2009) NEUROSCIENCE Glia - more than just brain glue. *Nature* 457(7230):675-677.
129. Vergara D, et al. (2009) Biomechanical and proteomic analysis of INF- beta-treated astrocytes. (Translated from English) *Nanotechnology* 20(45):455106 (in English).
130. Hatten ME (1985) NEURONAL REGULATION OF ASTROGLIAL MORPHOLOGY AND PROLIFERATION INVITRO. *Journal of Cell Biology* 100:384-396.
131. Wilson A, et al. (2008) Hematopoietic Stem Cells Reversibly Switch from Dormancy to Self-Renewal during Homeostasis and Repair. *Cell* 135(6):1118-1129.
132. Jellinger K (1978) GLIOBLASTOMA MULTIFORME - MORPHOLOGY AND BIOLOGY. (Translated from English) *Acta Neurochirurgica* 42(1-2):5-32 (in English).
133. Meeker RB, Azuma Y, Bragg DC, English RV, & Tompkins M (1999) Microglial proliferation in cortical neural cultures exposed to feline immunodeficiency virus. *Journal of Neuroimmunology* 101(1):15-26.
134. Shankaran M, et al. (2007) Measurement of brain microglial proliferation rates in vivo in response to neuroinflammatory stimuli: Application to drug discovery. *Journal of Neuroscience Research* 85(11):2374-2384.
135. Koguchi K, Nakatsuji Y, Okuno T, Sawada M, & Sakoda S (2003) Microglial cell cycle-associated proteins control microglial proliferation in vivo and in vitro and are regulated by GM-CSF and density-dependent inhibition. *Journal of Neuroscience Research* 74(6):898-905.
136. Vergara D, et al. (2009) Biomechanical and proteomic analysis of INF-beta-treated astrocytes. *Nanotechnology* 20(45).
137. Stoker MGP & Rubin H (1967) DENSITY DEPENDENT INHIBITION OF CELL GROWTH IN CULTURE. *Nature* 215(5097):171-&.
138. Lattera J, et al. (1997) Scatter factor hepatocyte growth factor gene transfer enhances glioma growth and angiogenesis in vivo. *Laboratory Investigation* 76(4):565-577.
139. Paugh BS, et al. (2009) Interleukin-1 Regulates the Expression of Sphingosine Kinase 1 in Glioblastoma Cells. *Journal of Biological Chemistry* 284(6):3408-3417.
140. Tada M & Detribolet N (1993) RECENT ADVANCES IN IMMUNOBIOLOGY OF BRAIN-TUMORS. (Translated from English) *Journal of Neuro-Oncology* 17(3):261-271 (in English).
141. Jennings MT, et al. (1991) TGF-BETA-1 AND TGF-BETA-2 ARE POTENTIAL GROWTH-REGULATORS FOR LOW-GRADE AND MALIGNANT GLIOMAS INVITRO - EVIDENCE IN SUPPORT OF AN AUTOCRINE HYPOTHESIS. *International Journal of Cancer* 49:129-139.
142. Jennings MT & Pietenpol JA (1998) The role of transforming growth factor beta in glioma progression. *Journal of Neuro-Oncology* 36(2):123-140.
143. Platten M, Wick W, & Weller M (2001) Malignant glioma biology: Role for TGF-beta in growth, motility, angiogenesis, and immune escape. *Microscopy Research and Technique* 52(4):401-410.
144. Keller G & Snodgrass R (1990) LIFE-SPAN OF MULTIPOTENTIAL HEMATOPOIETIC STEM-CELLS INVIVO. (Translated from English) *Journal of Experimental Medicine* 171(5):1407-1418 (in English).
145. Seruya M, et al. (2004) Clonal population of adult stem cells: Life span and differentiation potential. *Cell Transplantation* 13(2):93-101.
146. Simonsen JL, et al. (2002) Telomerase expression extends the proliferative life-span and maintains the osteogenic potential of human bone marrow stromal cells. *Nature Biotechnology* 20(6):592-596.
147. Bodnar AG, et al. (1998) Extension of life-span by introduction of telomerase into normal human cells. *Science* 279(5349):349-352.

148. Ross HJ, Sato N, Ueyama Y, & Koeffler HP (1991) CYTOKINE MESSENGER-RNA STABILITY IS ENHANCED IN TUMOR-CELLS. (Translated from English) *Blood* 77(8):1787-1795 (in English).
149. Beutler BA, Milsark IW, & Cerami A (1985) CACHECTIN TUMOR NECROSIS FACTOR - PRODUCTION, DISTRIBUTION, AND METABOLIC-FATE INVIVO. (Translated from English) *Journal of Immunology* 135(6):3972-3977 (in English).
150. Blick M, Sherwin SA, Rosenblum M, & Gutterman J (1987) PHASE-I STUDY OF RECOMBINANT TUMOR-NECROSIS-FACTOR IN CANCER-PATIENTS. (Translated from English) *Cancer Research* 47(11):2986-2989 (in English).
151. Chapman PB, *et al.* (1987) CLINICAL-PHARMACOLOGY OF RECOMBINANT HUMAN-TUMOR NECROSIS FACTOR IN PATIENTS WITH ADVANCED CANCER. *Journal of Clinical Oncology* 5(12):1942-1951.
152. Fong Y, Moldawer LL, Shires GT, & Lowry SF (1990) THE BIOLOGIC CHARACTERISTICS OF CYTOKINES AND THEIR IMPLICATION IN SURGICAL INJURY. *Surgery Gynecology & Obstetrics* 170(4):363-378.
153. Schetz M, Ferdinande P, Vandenberghe G, Verwaest C, & Lauwers P (1995) REMOVAL OF PRO-INFLAMMATORY CYTOKINES WITH RENAL REPLACEMENT THERAPY - SENSE OR NONSENSE. *Intensive Care Medicine* 21(2):169-176.
154. Glauche I, *et al.* (2009) Stem Cell Proliferation and Quiescence-Two Sides of the Same Coin. *Plos Computational Biology* 5(7).
155. Horsley V, Aliprantis AO, Polak L, Glimcher LH, & Fuchs E (2008) NFATc1 balances quiescence and proliferation of skin stem cells. *Cell* 132(2):299-310.
156. Venezia TA, *et al.* (2004) Molecular signatures of proliferation and quiescence in hematopoietic stem cells. *Plos Biology* 2(10):1640-1651.
157. Higuchi M, Ohnishi T, Arita N, Hiraga S, & Hayakawa T (1993) EXPRESSION OF TENASCIN IN HUMAN GLIOMAS - ITS RELATION TO HISTOLOGICAL MALIGNANCY, TUMOR DEDIFFERENTIATION AND ANGIOGENESIS. (Translated from English) *Acta Neuropathol.* 85(5):481-487 (in English).
158. Dai C, *et al.* (2001) PDGF autocrine stimulation dedifferentiates cultured astrocytes and induces oligodendrogliomas and oligoastrocytomas from neural progenitors and astrocytes in vivo. (Translated from English) *Genes Dev.* 15(15):1913-1925 (in English).
159. van Veelen MLC, Avezaat CJJ, Kros JM, van Putten W, & Vecht C (1998) Supratentorial low grade astrocytoma: prognostic factors, dedifferentiation, and the issue of early versus late surgery. (Translated from English) *J. Neurol. Neurosurg. Psychiatry* 64(5):581-587 (in English).
160. Niwa H, Miyazaki J, & Smith AG (2000) Quantitative expression of Oct-3/4 defines differentiation, dedifferentiation or self-renewal of ES cells. (Translated from English) *Nature Genet.* 24(4):372-376 (in English).
161. Zhang QB, *et al.* (2006) Differentiation profile of brain tumor stem cells: a comparative study with neural stem cells. (Translated from English) *Cell Res.* 16(12):909-915 (in English).
162. Araten DJ, *et al.* (2005) A quantitative measurement of the human somatic mutation rate. *Cancer Research* 65(18):8111-8117.
163. Tomlinson IPM, Novelli MR, & Bodmer WF (1996) The mutation rate and cancer. *Proceedings of the National Academy of Sciences of the United States of America* 93(25):14800-14803.
164. Jackson AL & Loeb LA (1998) The mutation rate and cancer. *Genetics* 148(4):1483-1490.
165. Benveniste EN, Tang LP, & Law RM (1995) DIFFERENTIAL REGULATION OF ASTROCYTE TNF-ALPHA EXPRESSION BY THE CYTOKINES TGF-BETA, IL-6 AND IL-10. *International Journal of Developmental Neuroscience* 13(3-4):341-349.



166. Takano S, *et al.* (1996) Concentration of vascular endothelial growth factor in the serum and tumor tissue of brain tumor patients. (Translated from English) *Cancer Research* 56(9):2185-2190 (in English).
